# Supplementary material for: Unexpected N-glycosidation reaction of glycals with 1-amino-anthracene: structure revision and application to the synthesis of new analogues of marmycin A
Source: Royal Society of Chemistry journal article supplement (doi:10.1039/c2ob27020j), 2012-12-13
Supplement: c2ob27020j.pdf [file c2ob27020j.pdf]

## Supporting Information

# Unexpected *N*-Glycosidation Reaction of Glycals with 1-Amino-anthracene: Structure Revision and Application to the Synthesis of New Analogues of Marmycin A

Xuefeng Zhang,<sup>†, #</sup> Xiaolong Jiang,<sup>‡, #</sup> Chunyong Ding,<sup>†</sup> Qizheng Yao,<sup>\*, ‡</sup> Ao Zhang<sup>\*, †</sup>

*CAS Key Laboratory of Receptor Research, Synthetic Organic & Medicinal Chemistry Laboratory (SOMCL), Shanghai Institute of Materia Medica (SIMM), Chinese Academy of Sciences, Shanghai, China 201203, and Department of Medicinal Chemistry, China Pharmaceutical University, Nanjing 210009, China*

***aozhang@mail.shcnc.ac.cn; qz\_yao@yahoo.com.cn***

## Content

|                                                |        |
|------------------------------------------------|--------|
| Spectroscopic Data for all new compounds ..... | S2-S43 |
| CD Spectra of compounds 22 and 23 .....        | S44-46 |

---

<sup>†</sup> Synthetic Organic & Medicinal Chemistry Laboratory (SOMCL), Shanghai Institute of Materia Medica (SIMM).

<sup>‡</sup> Department of Medicinal Chemistry, China Pharmaceutical University.

<sup>#</sup> These two authors contributed equally to this work.

## Spectroscopic Data for Products

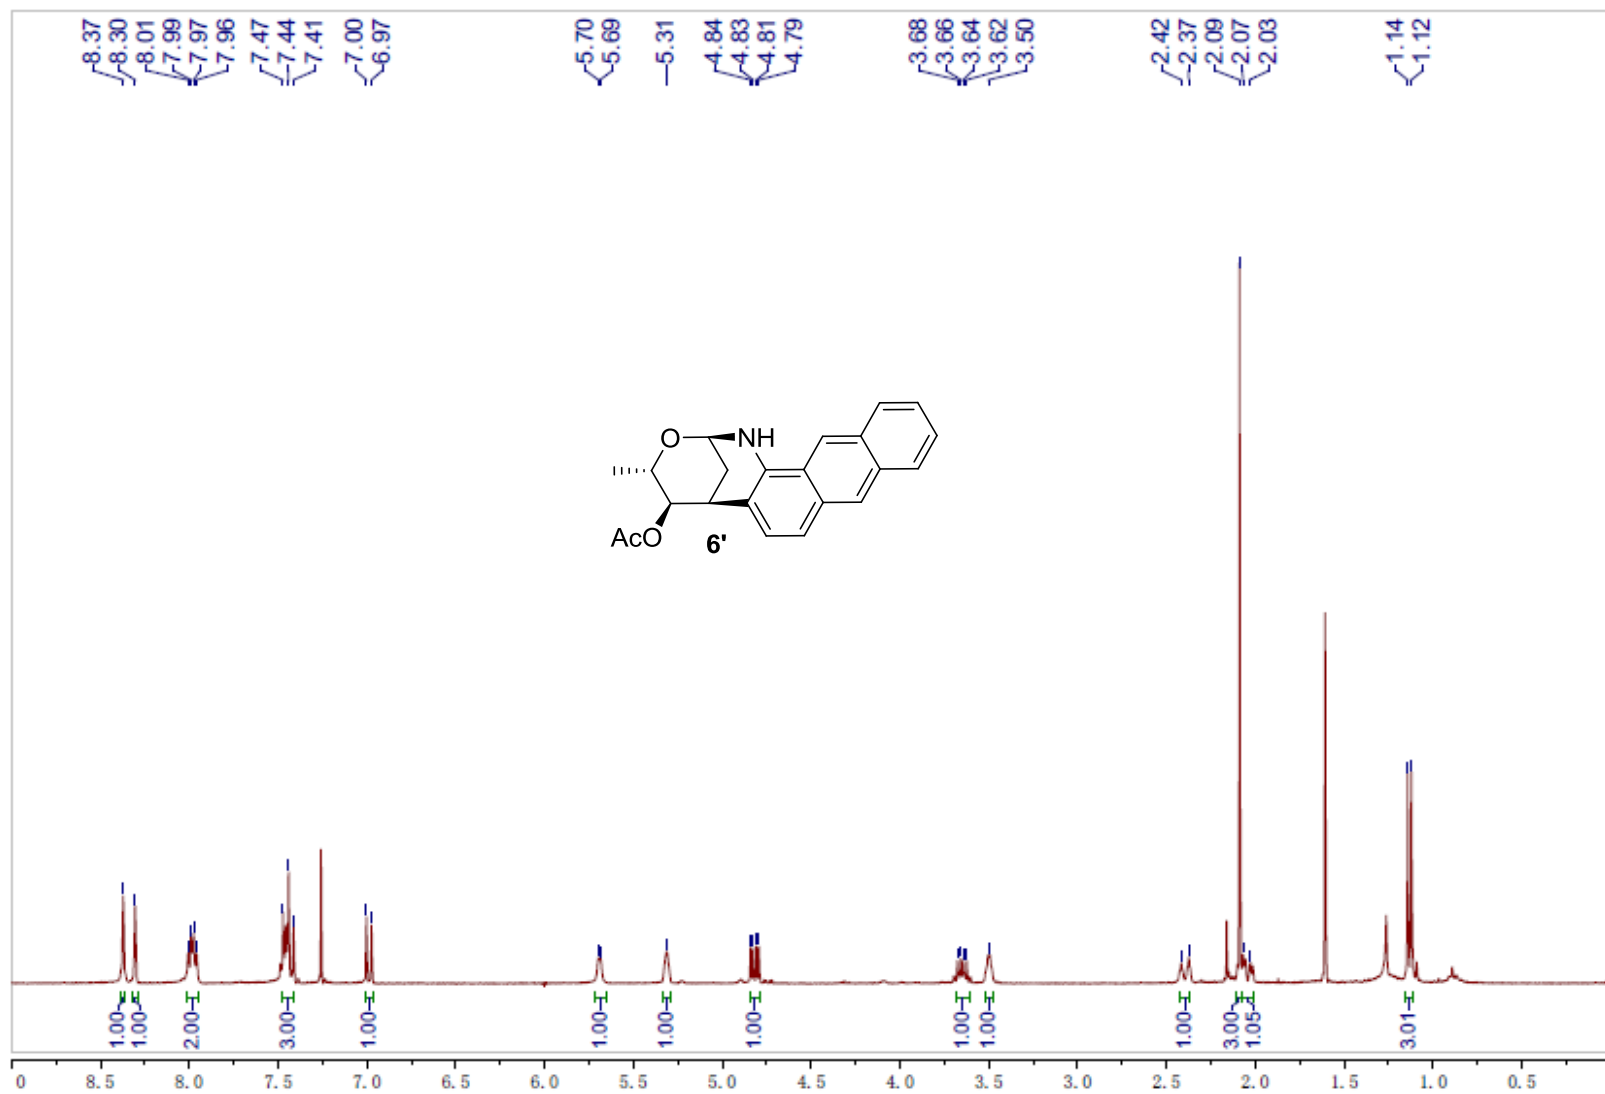

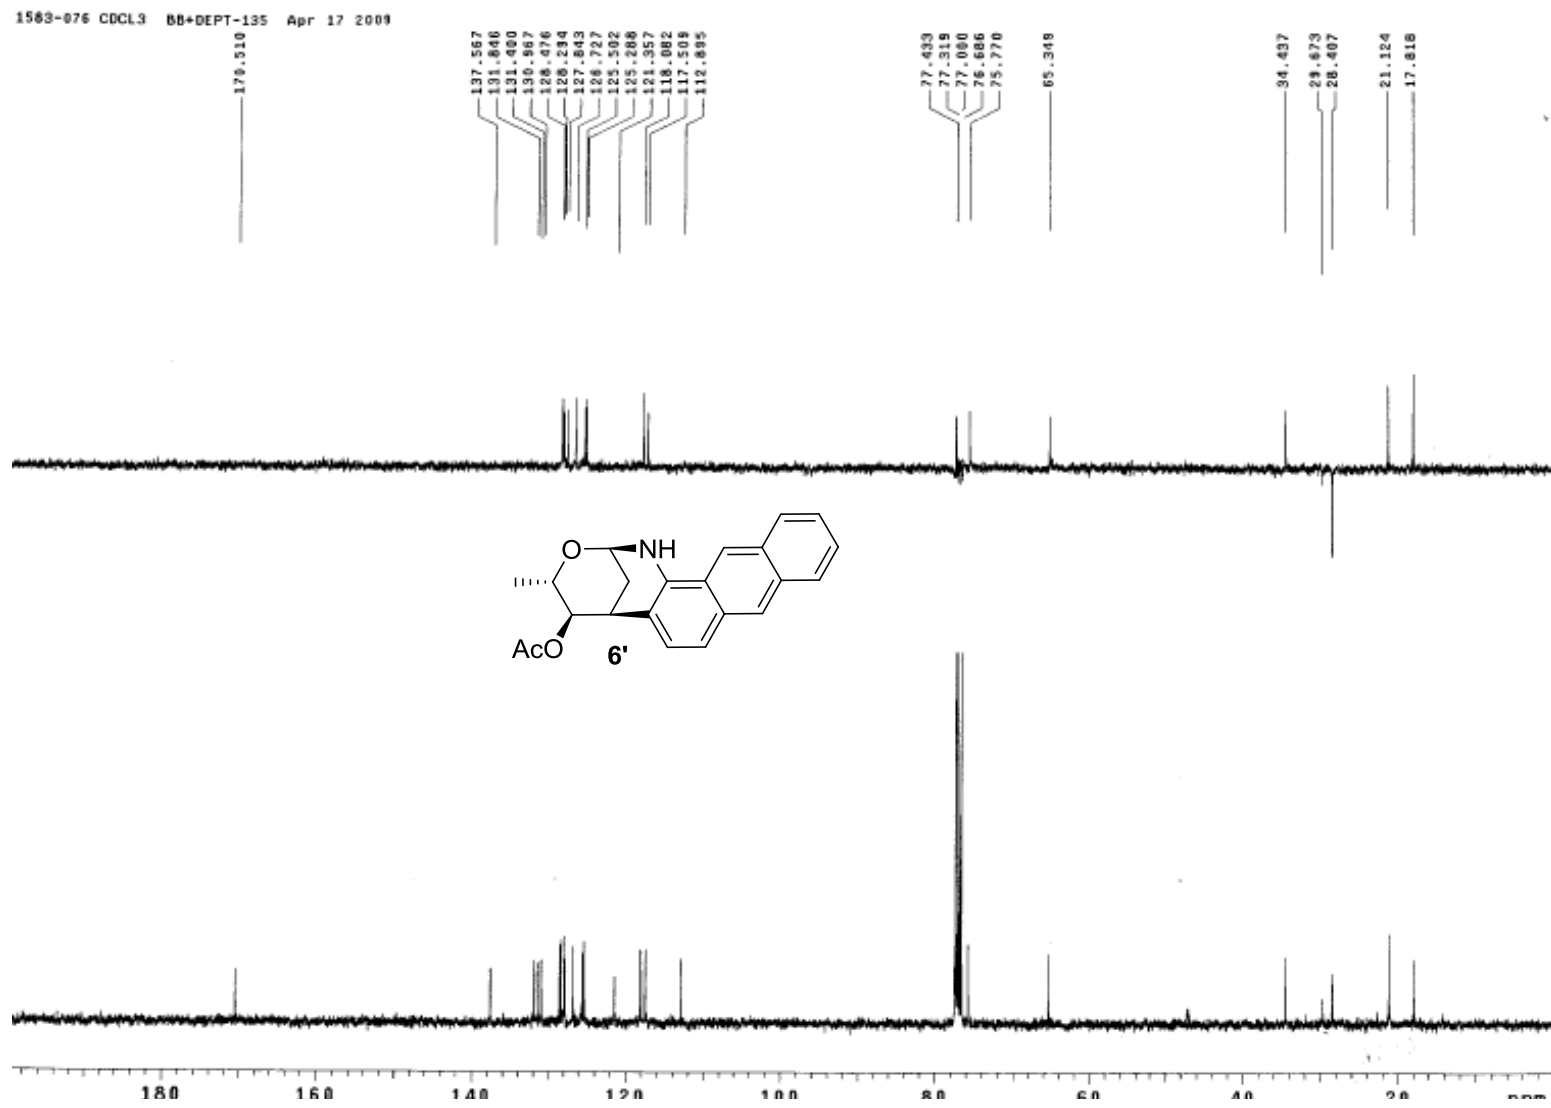

1583-076-1 CDC13 HMBC

HMBC

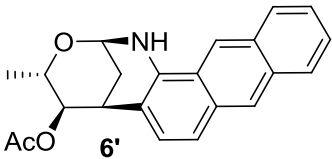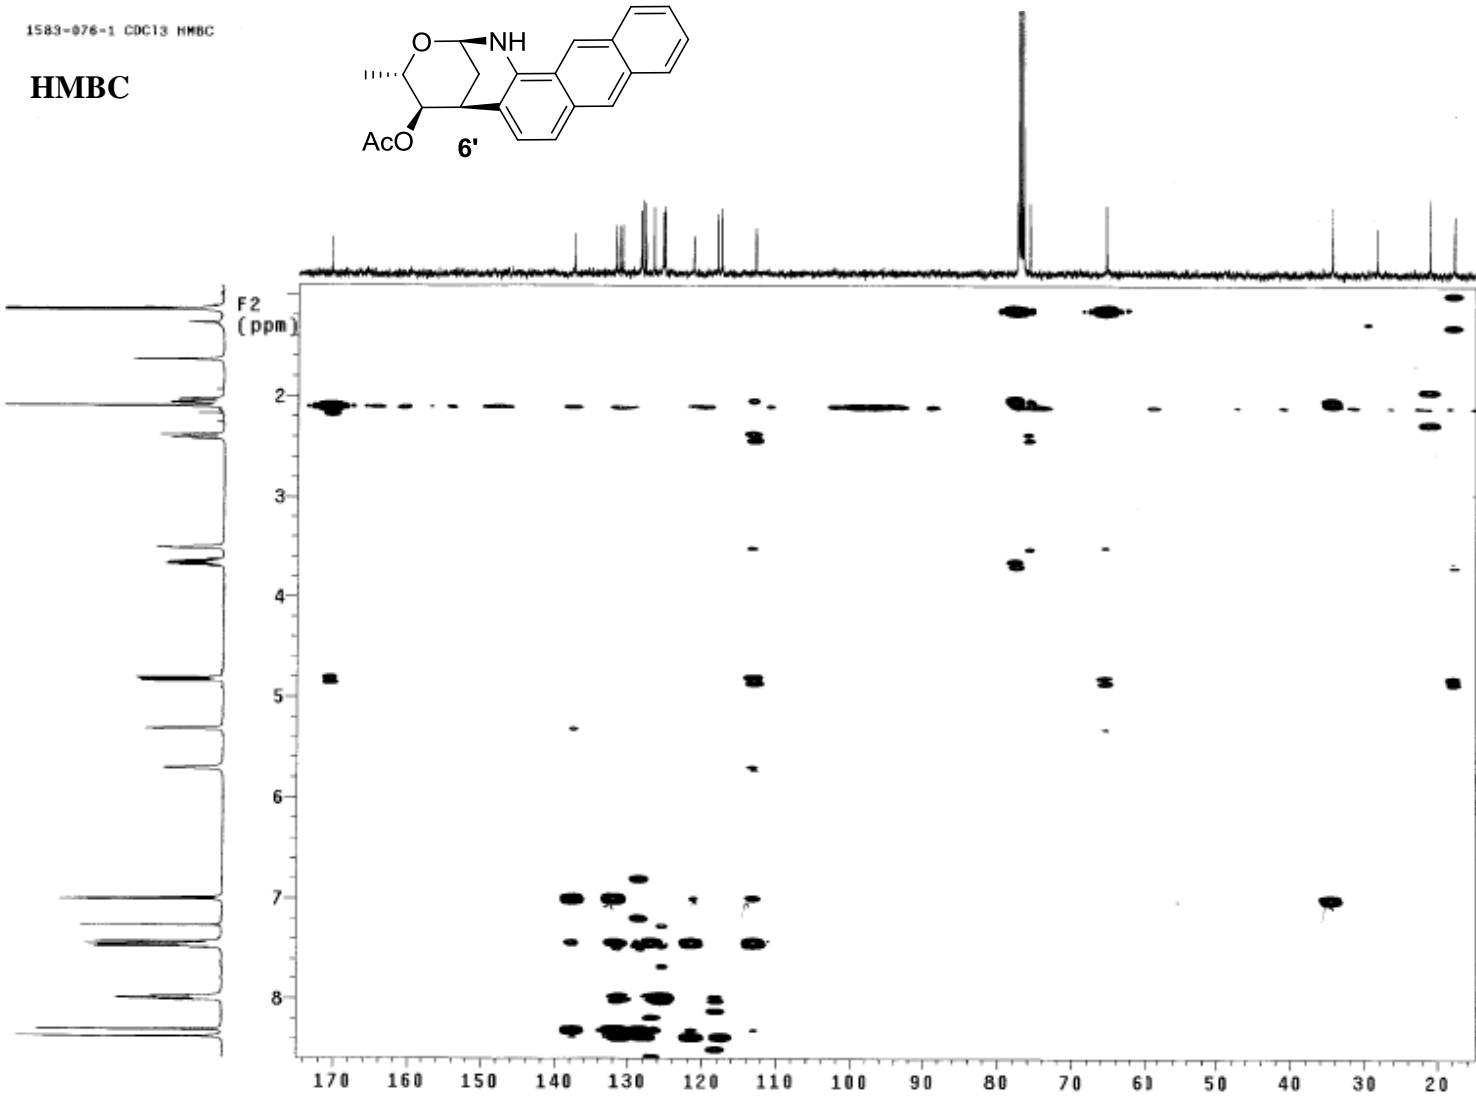

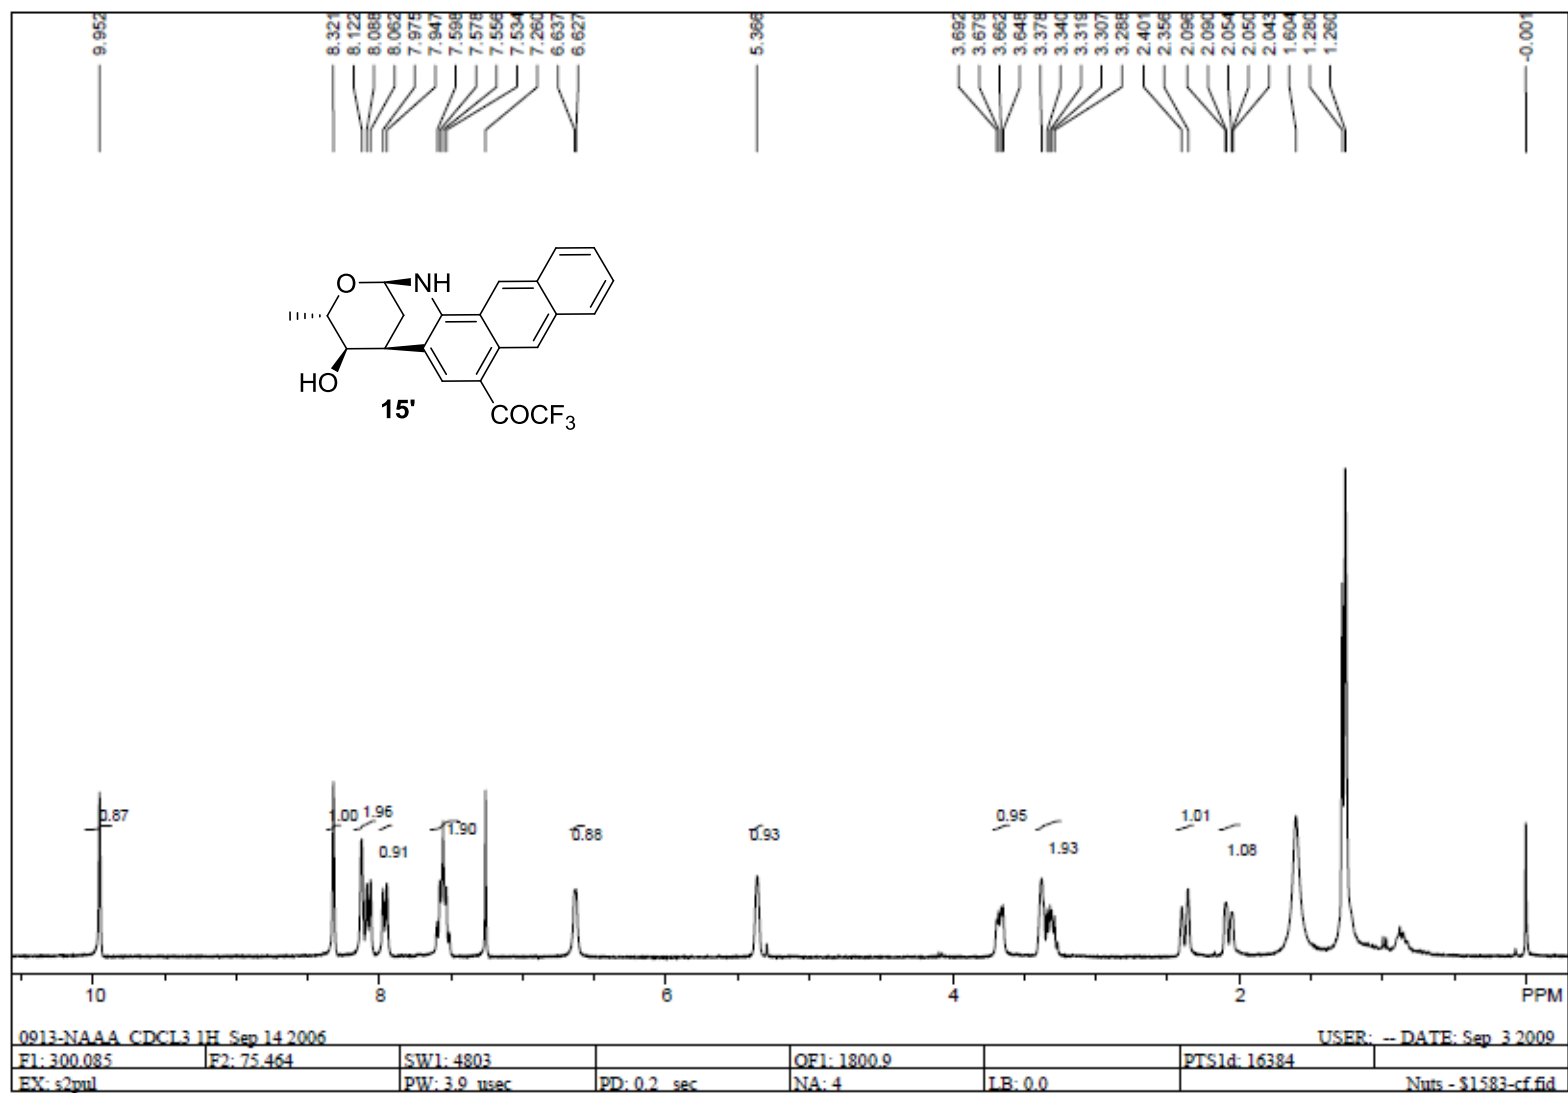

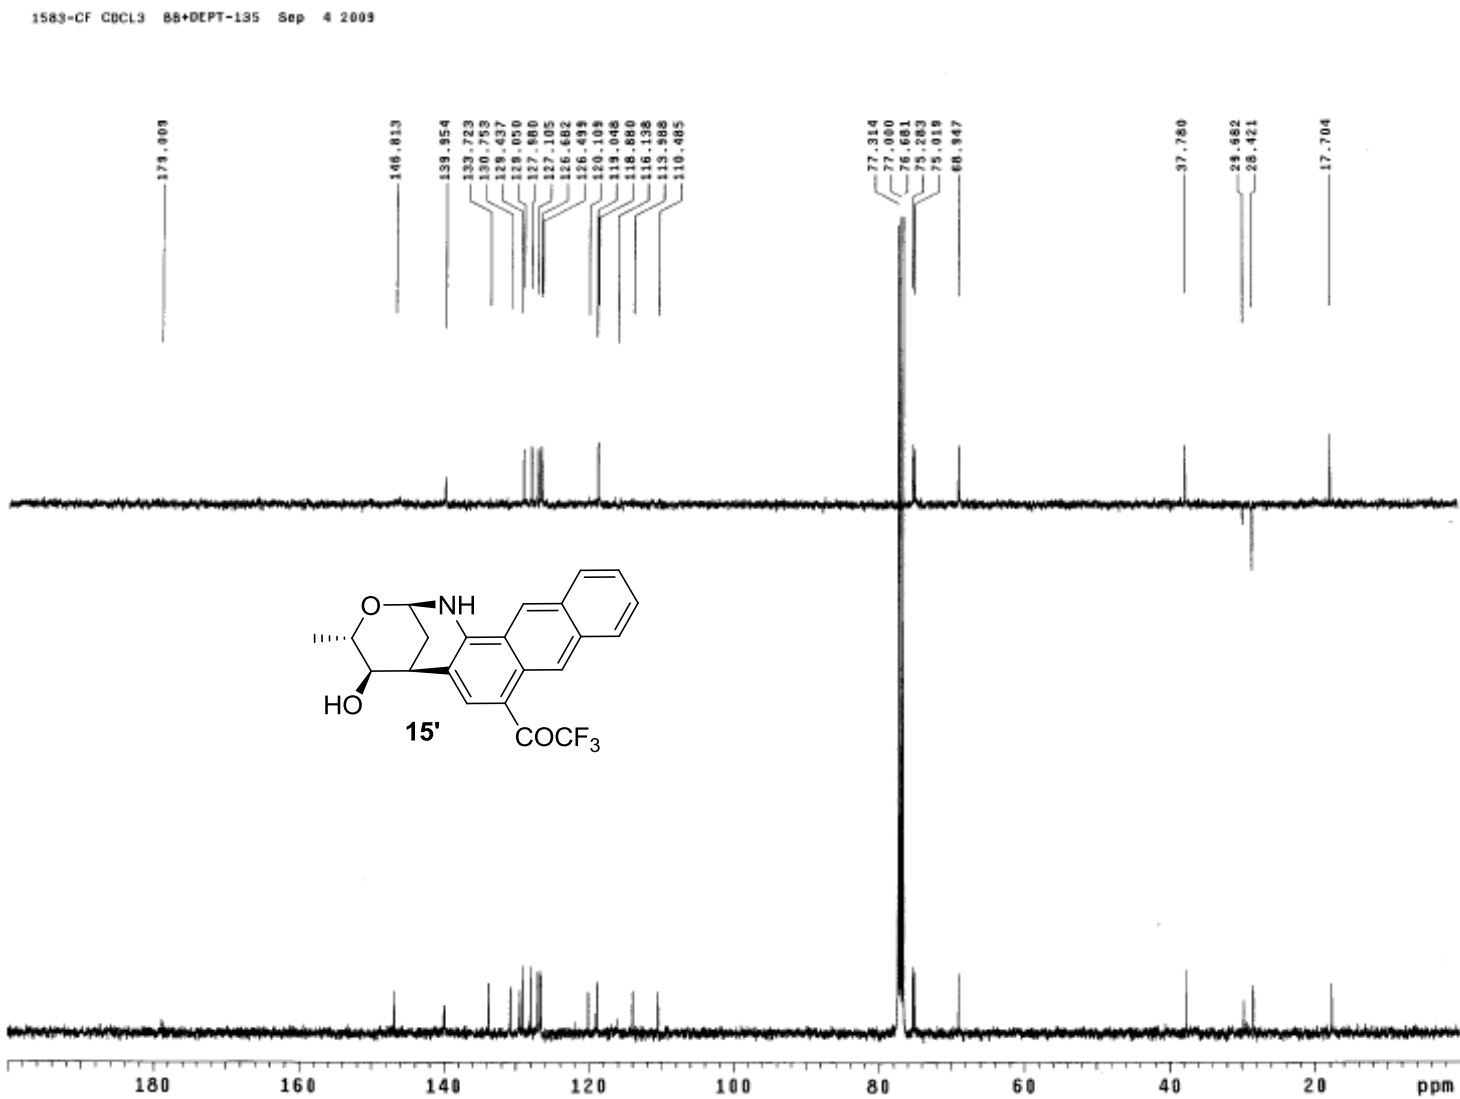

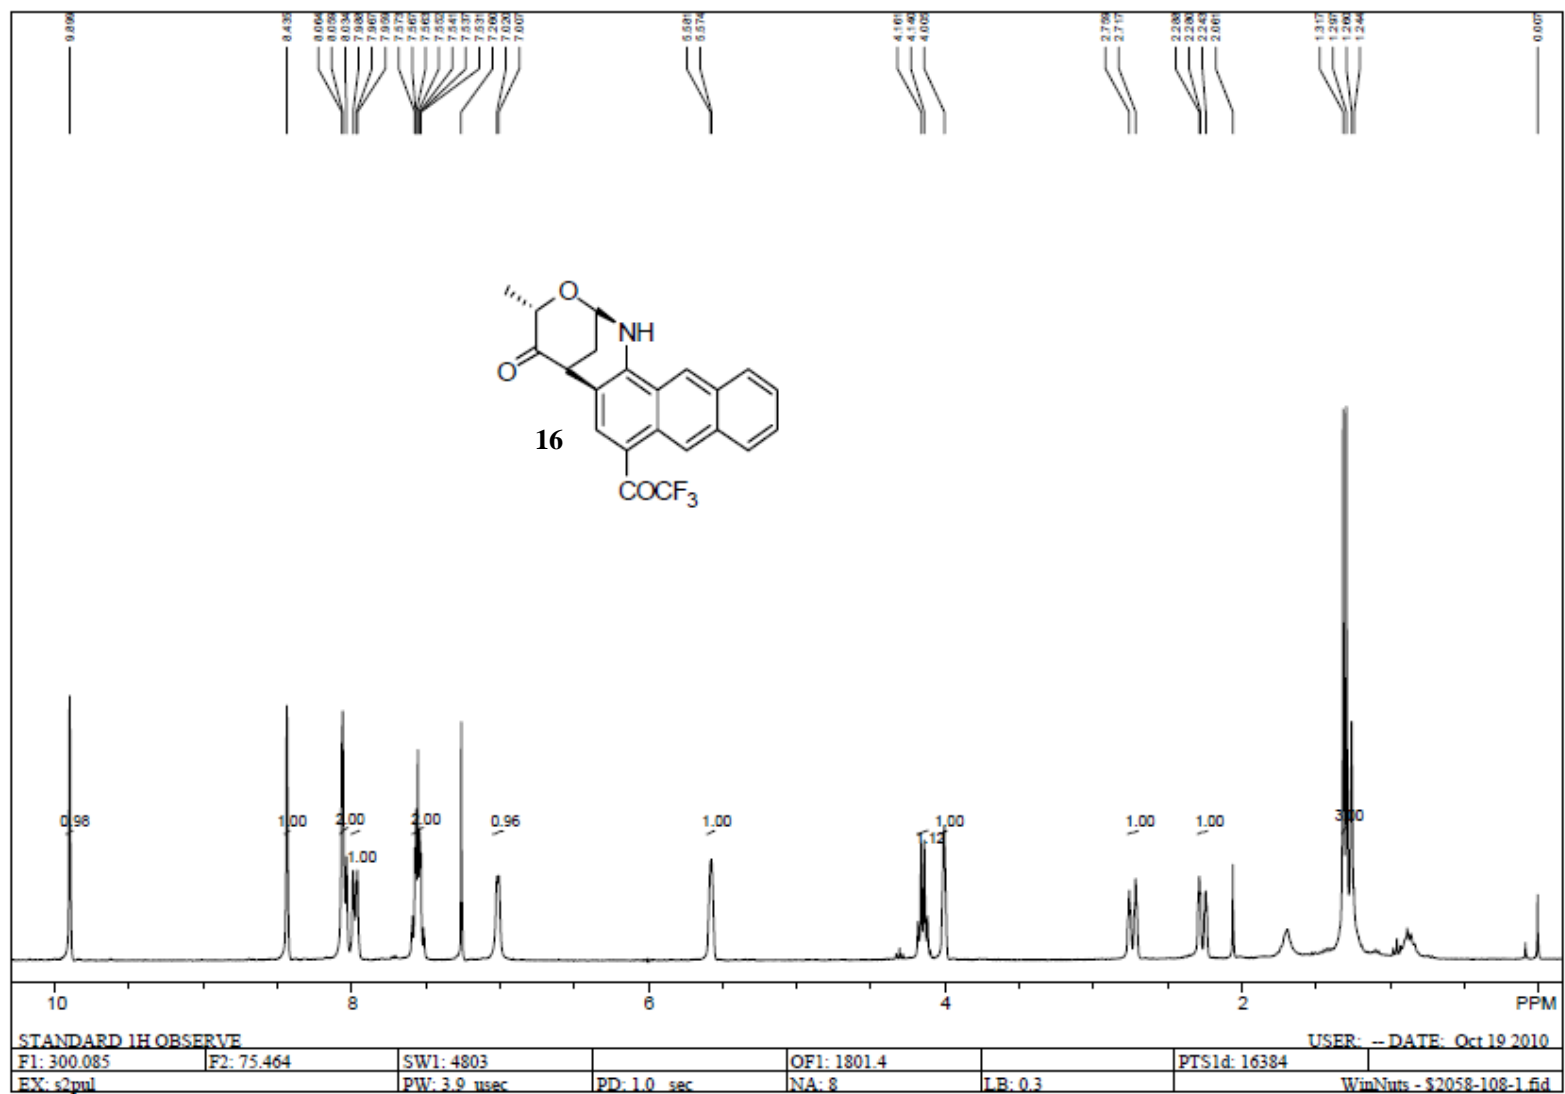

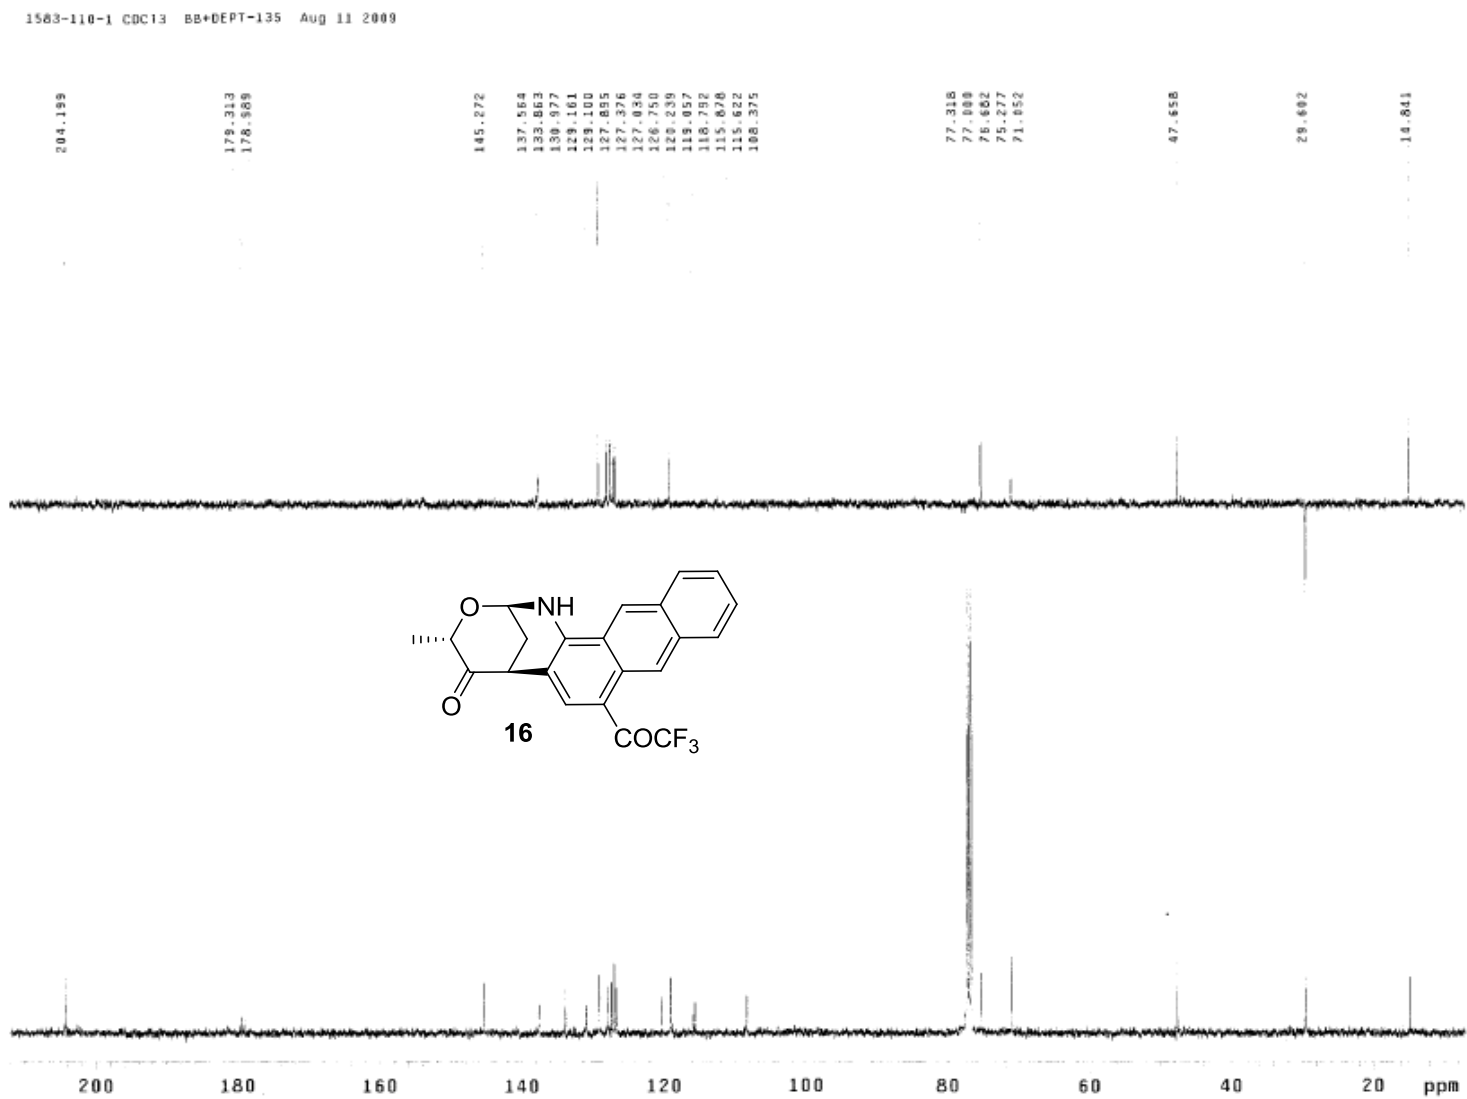



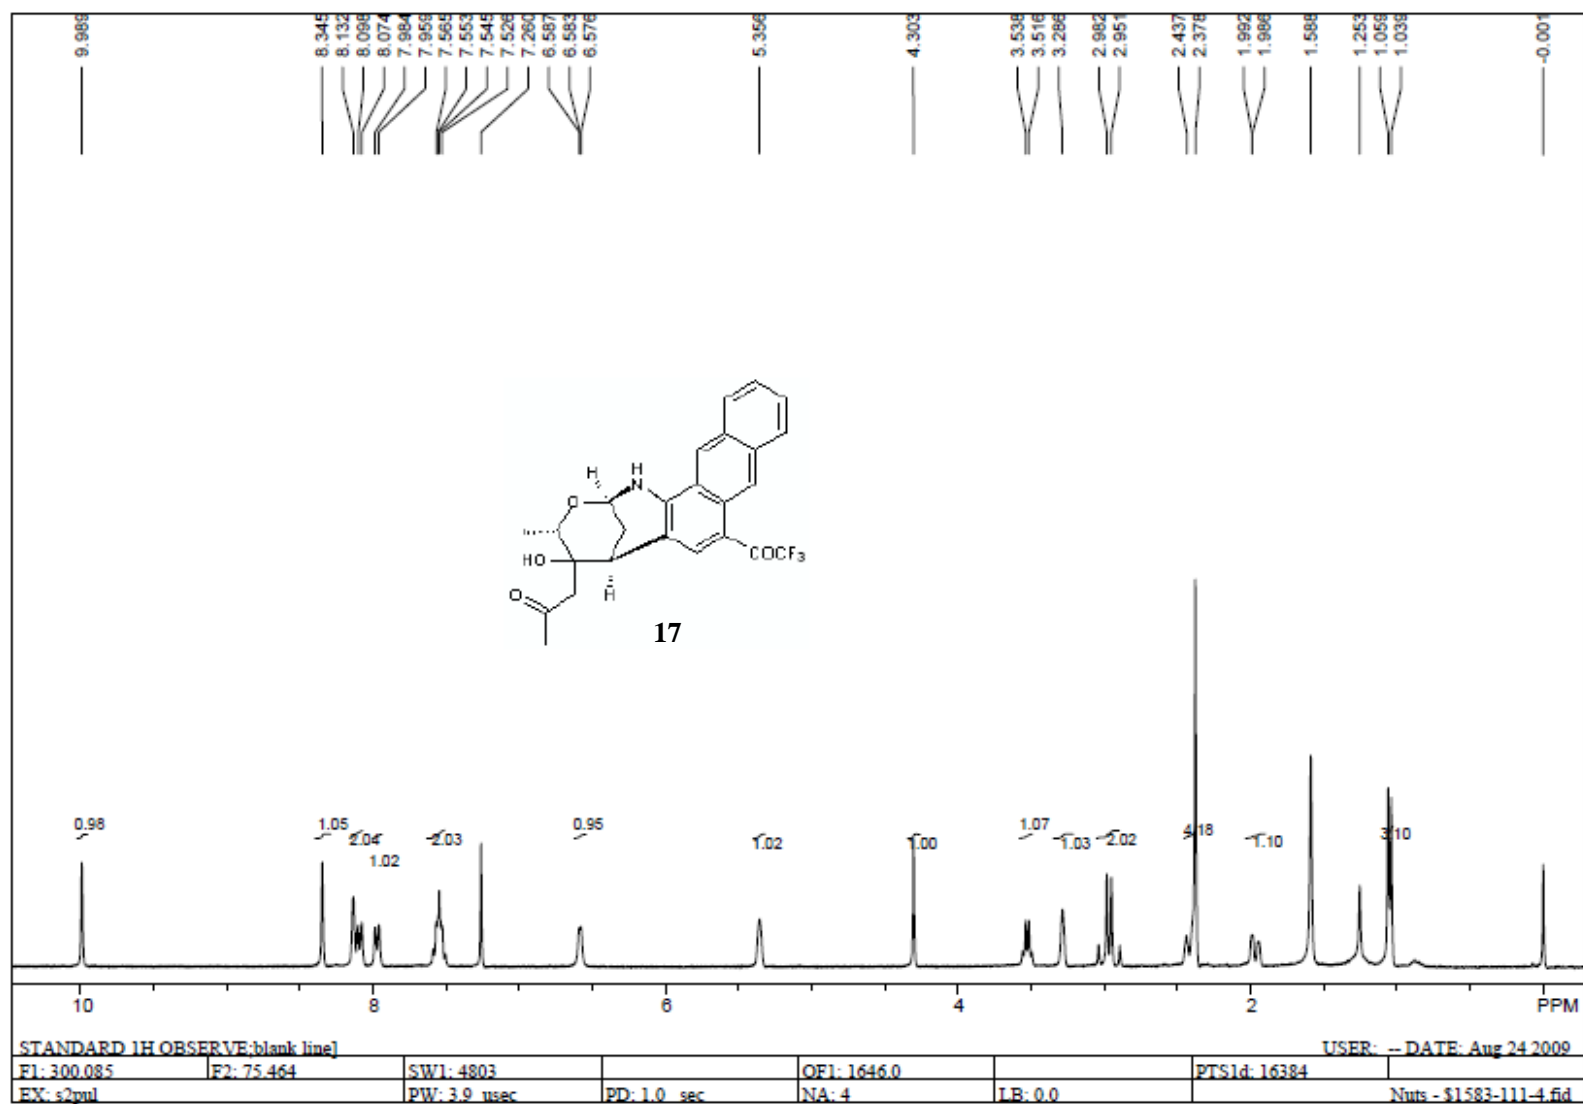

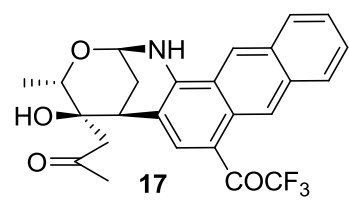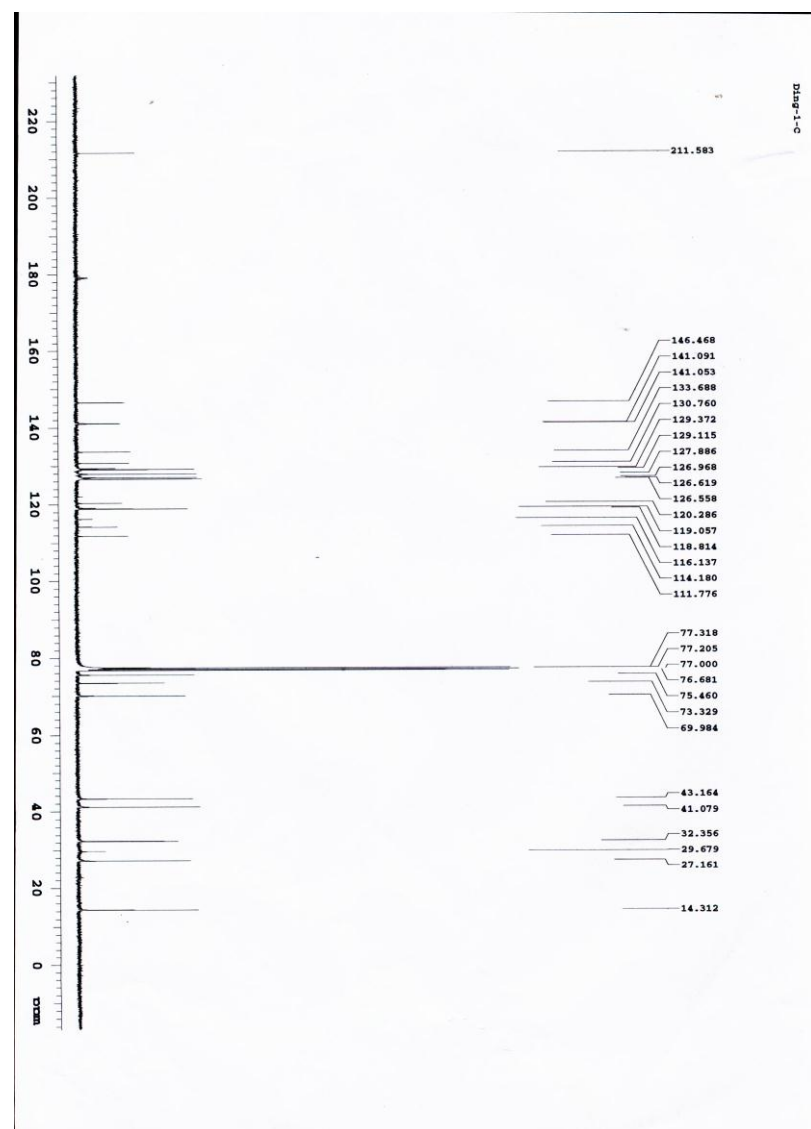

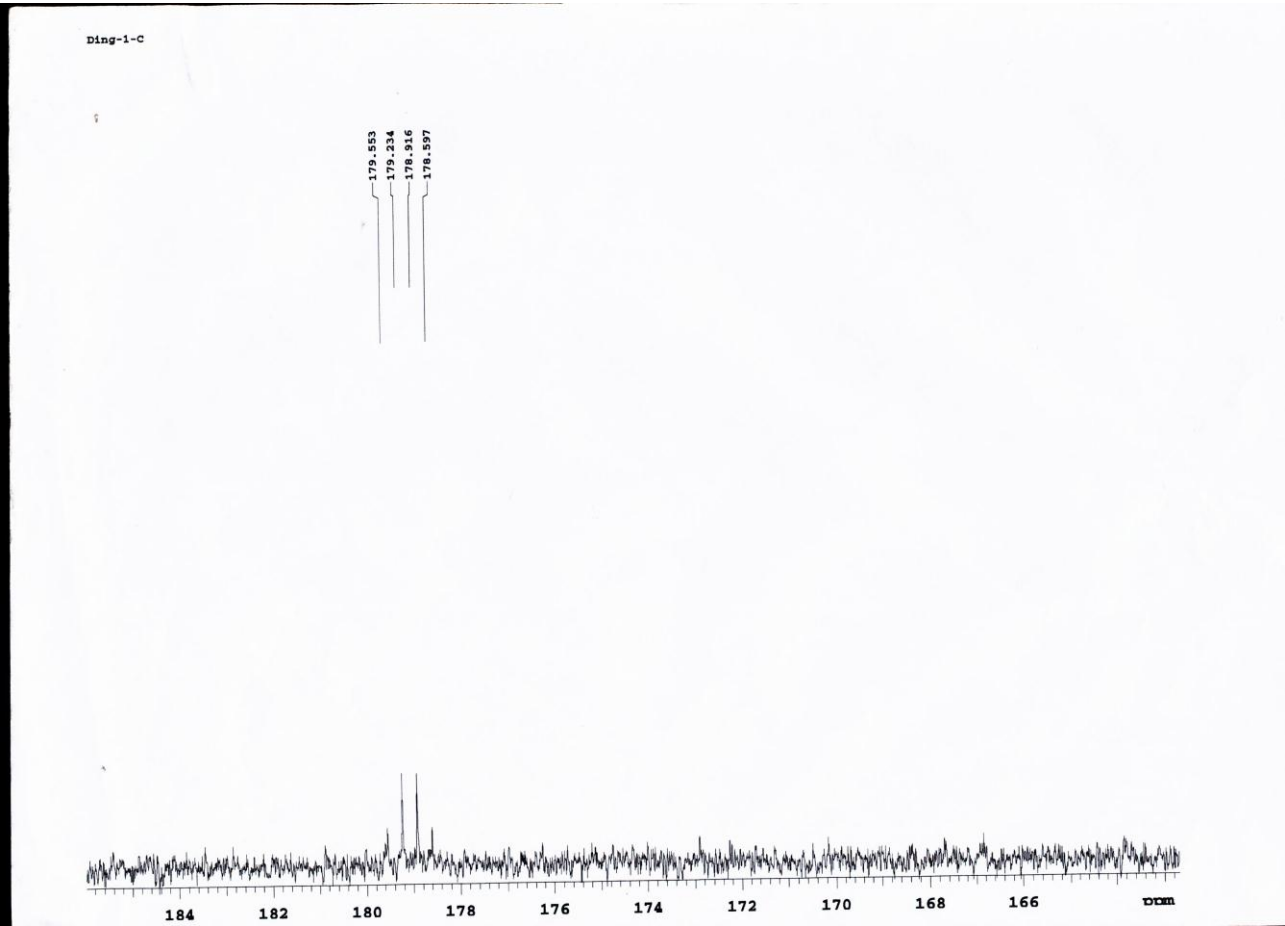

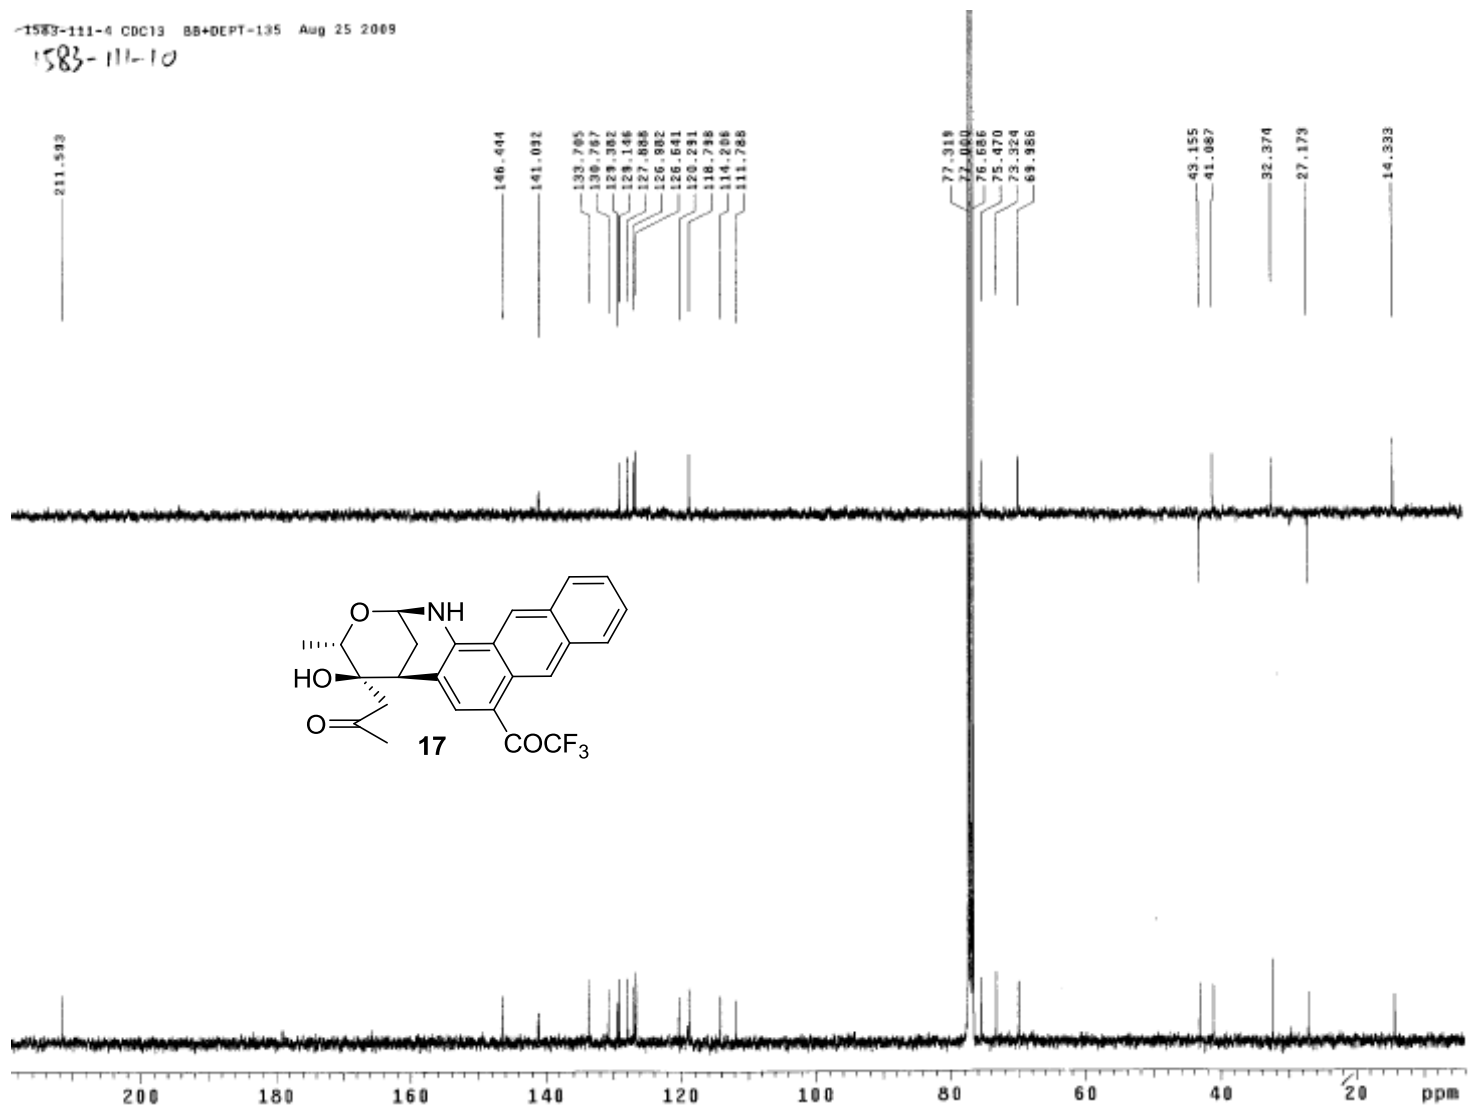

**<sup>19</sup>F-NMR**  
Dmg-1-F

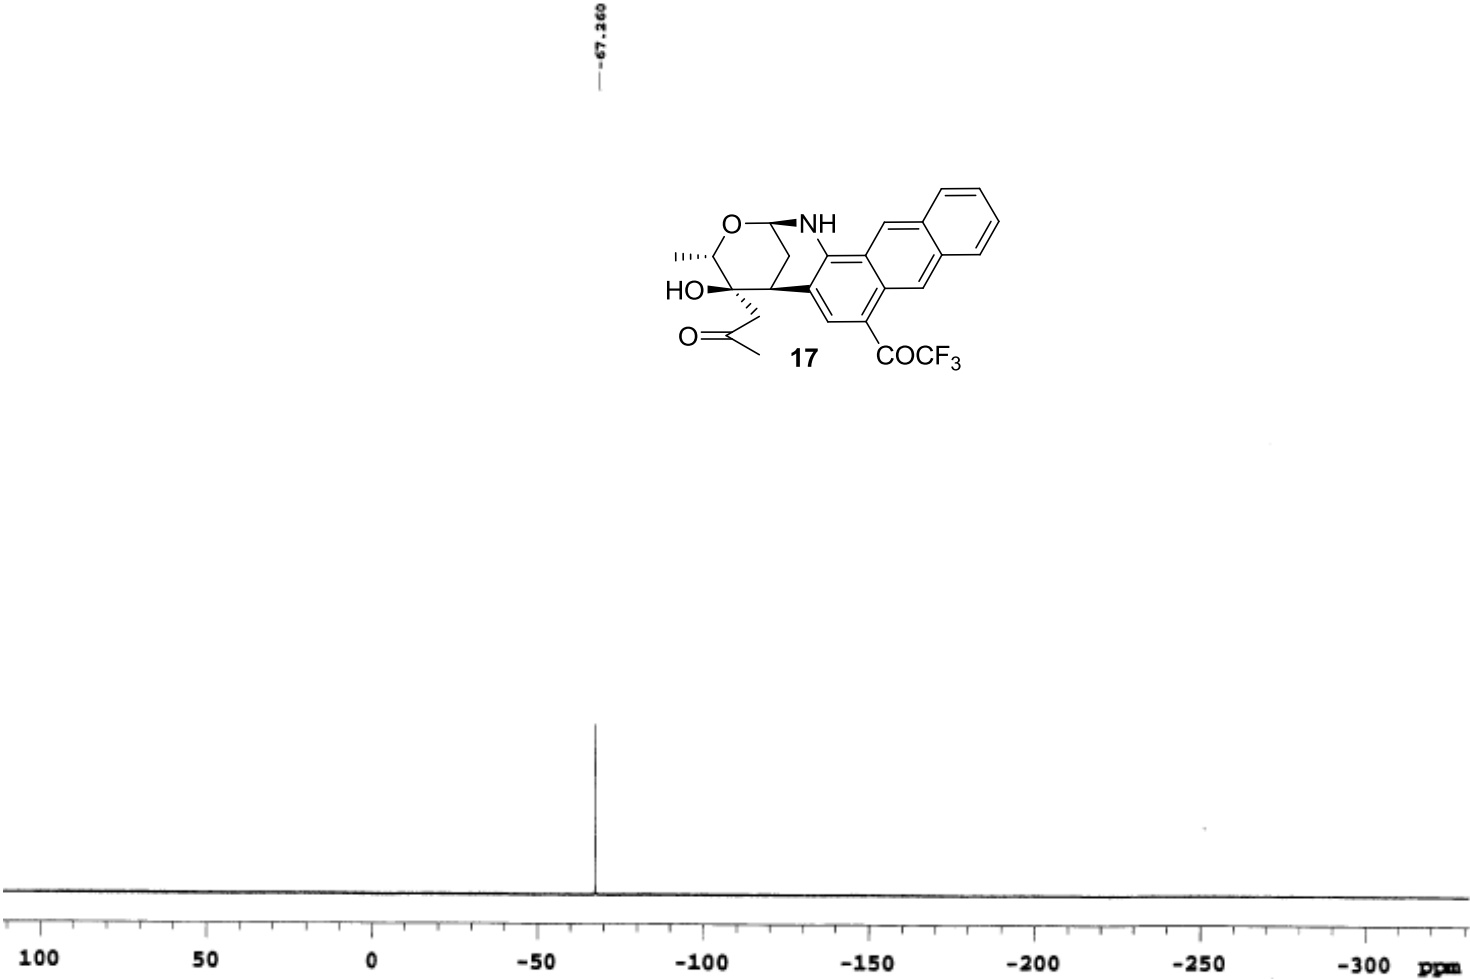

HMBC

1583-111-10 CDCl3 HMBC

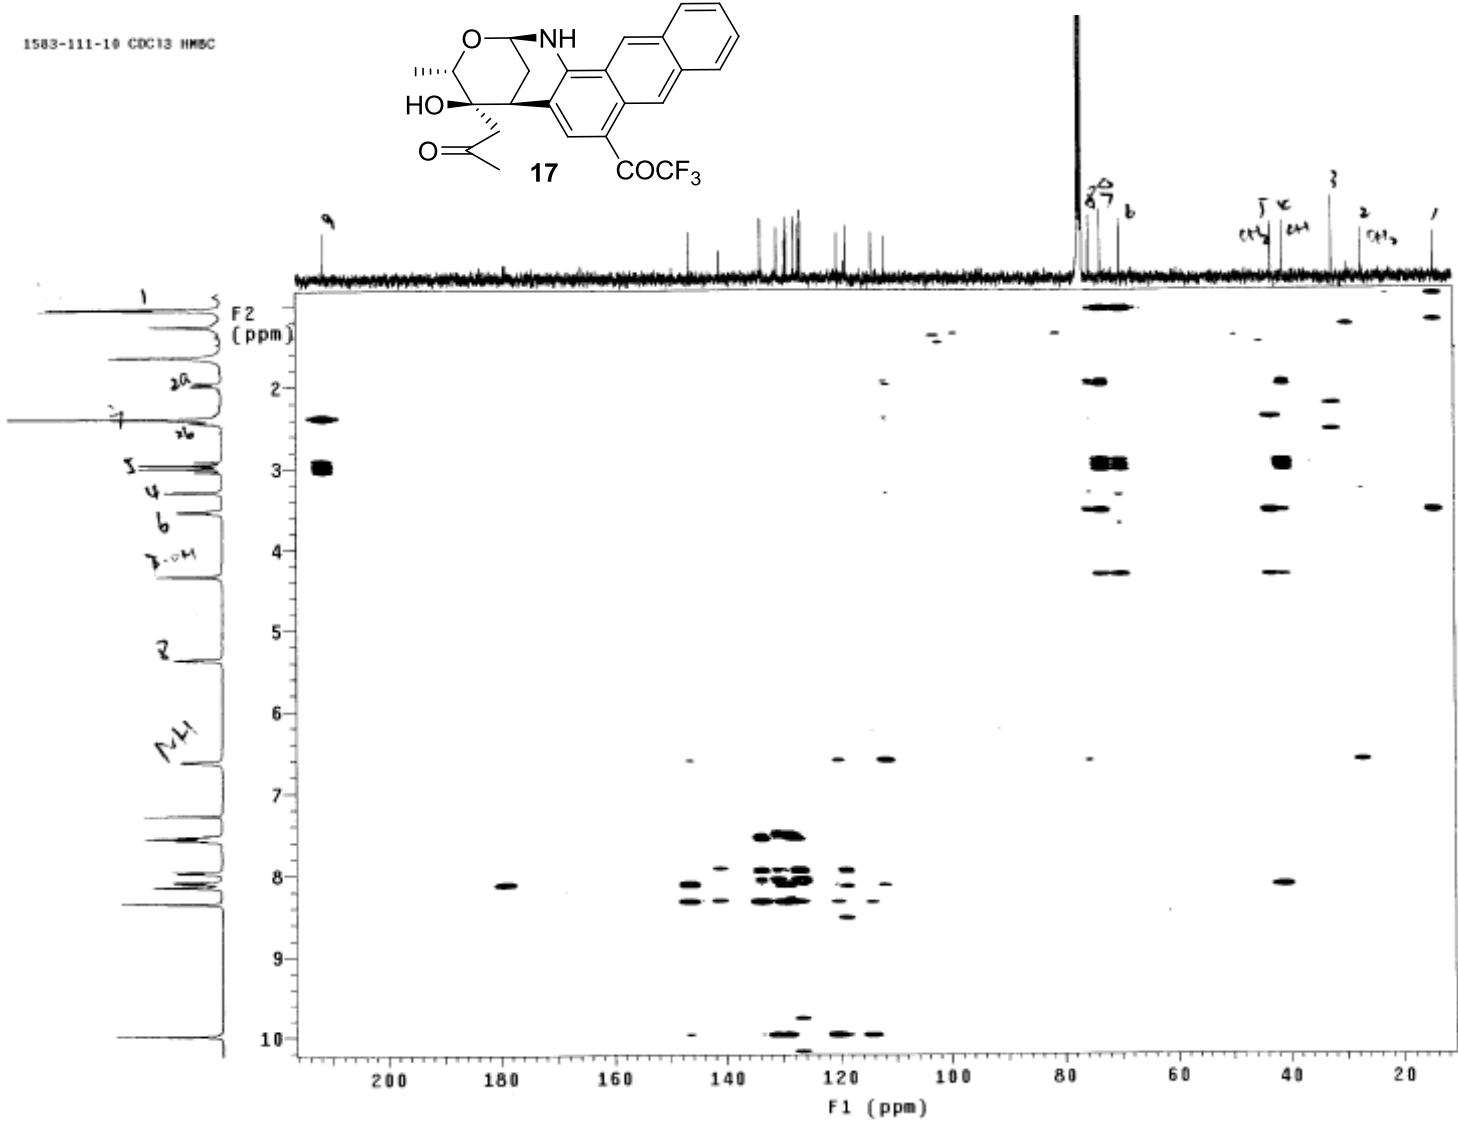

HSQC

1583-111-10 CDCl3 HSQC

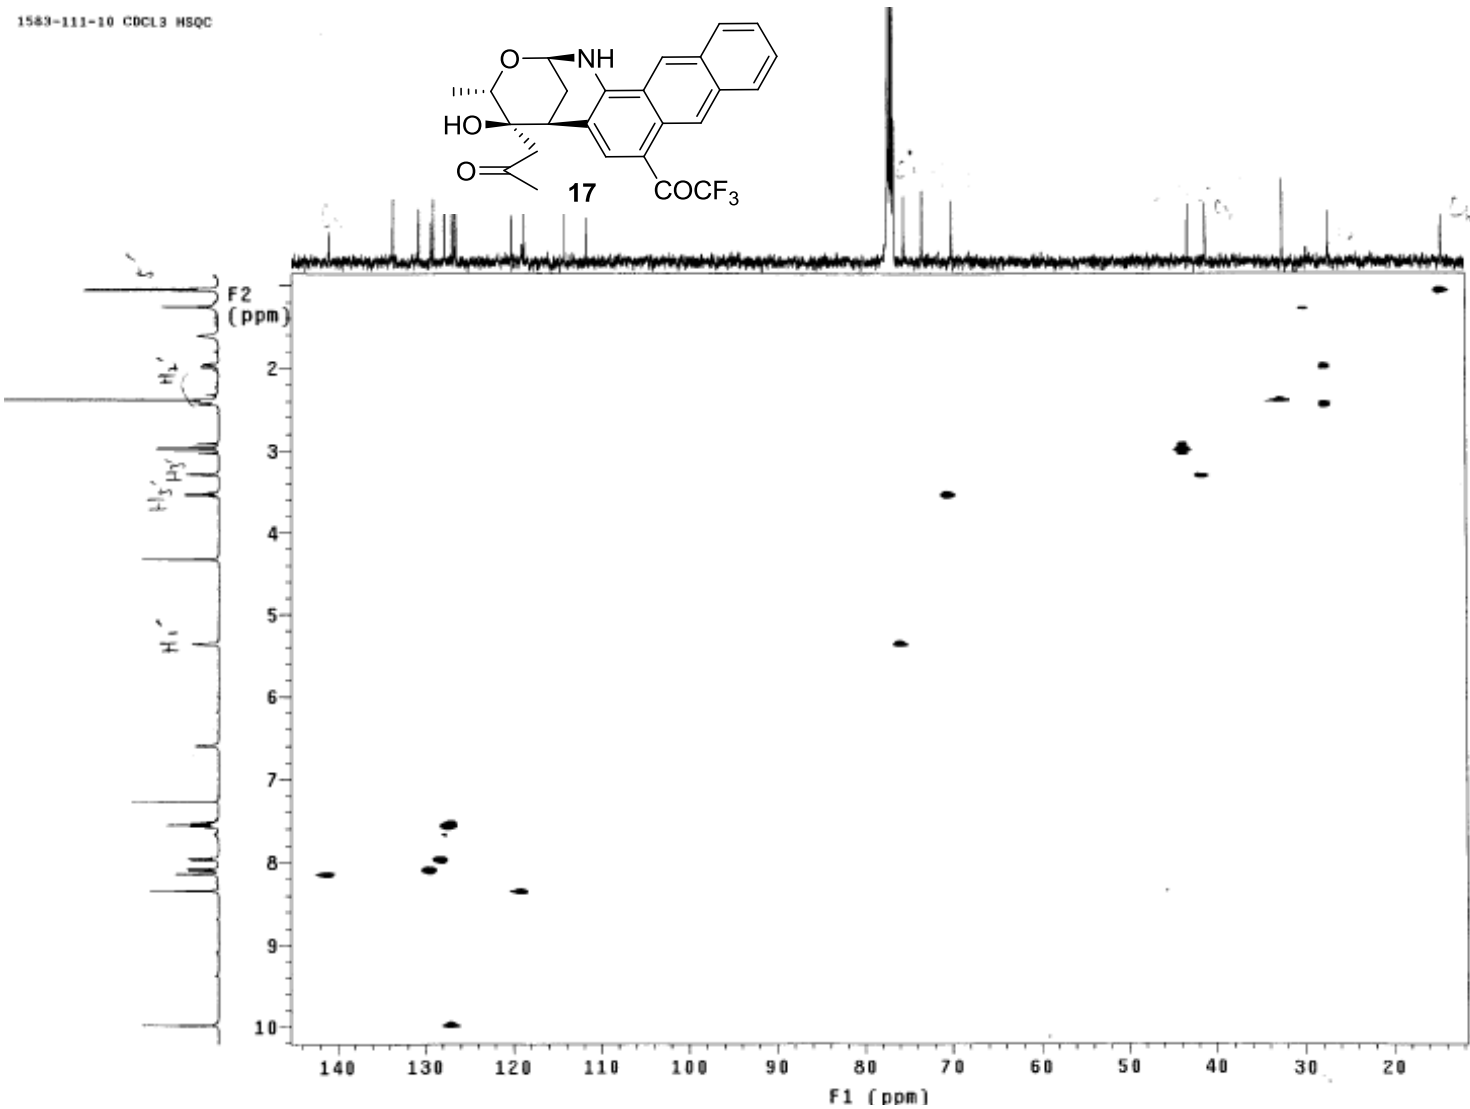

**COSY**

1583-111-10 CDC13 COSY

Solvent: CDCl3  
Ambient temperature  
File: 1583-111-10\_cosy  
Mercury-400BB "sinn401"

```
Relax delay 1.000 sec
COSY 30-80
Acq. time 0.171 sec
Width 6003.6 MZ
2D Width 6003.6 MZ
4 repetitions
320 increments
OBSERVE H1, 400.1645834 MHz
DATA PROCESSING
Sq. sine bell 0.085 sec
F1 DATA PROCESSING
Sq. sine bell 0.027 sec
FT size 2048 x 2048
Total time 28 min, 21 sec
```

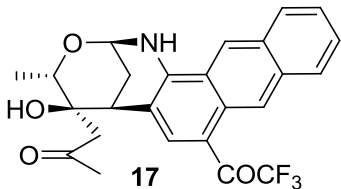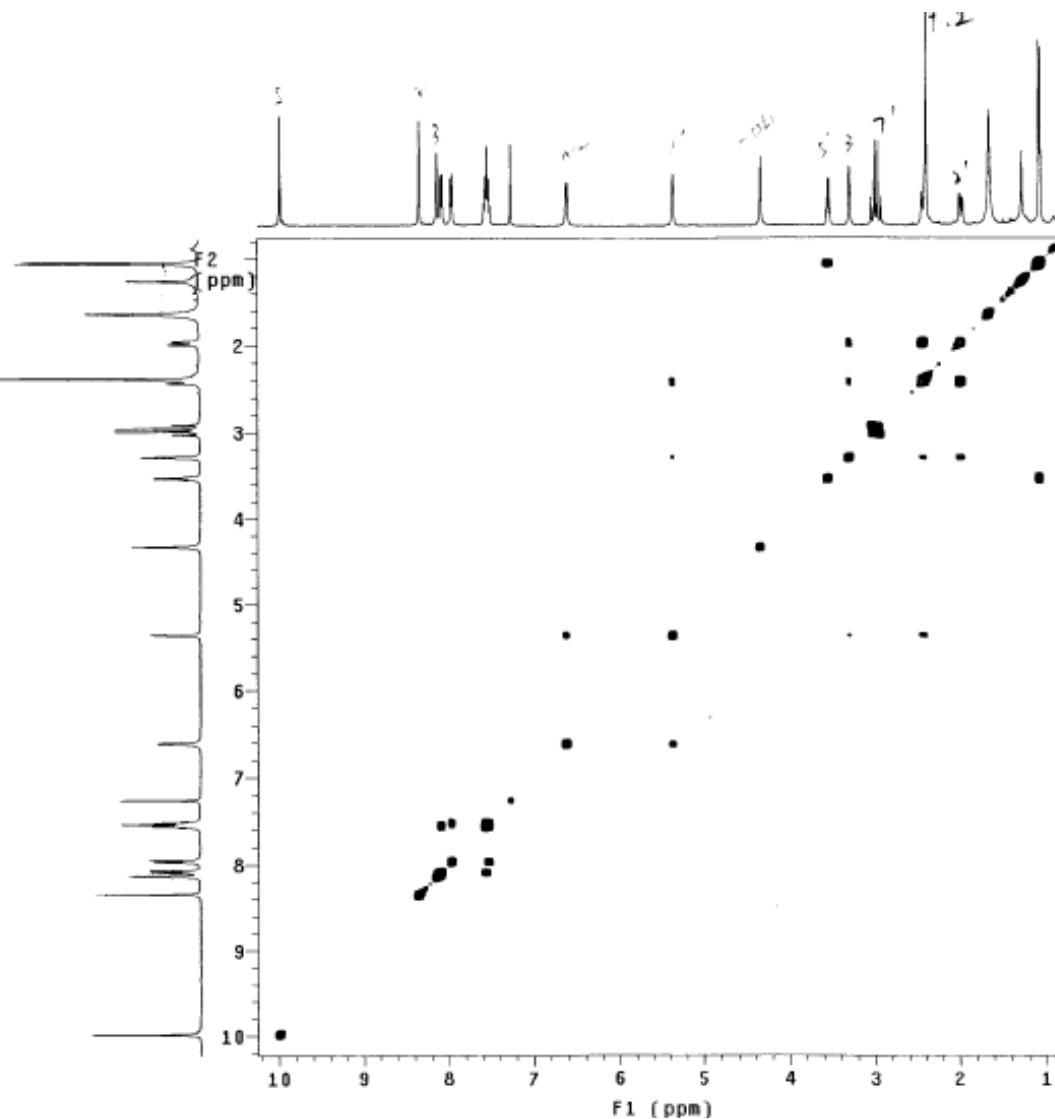



# CD

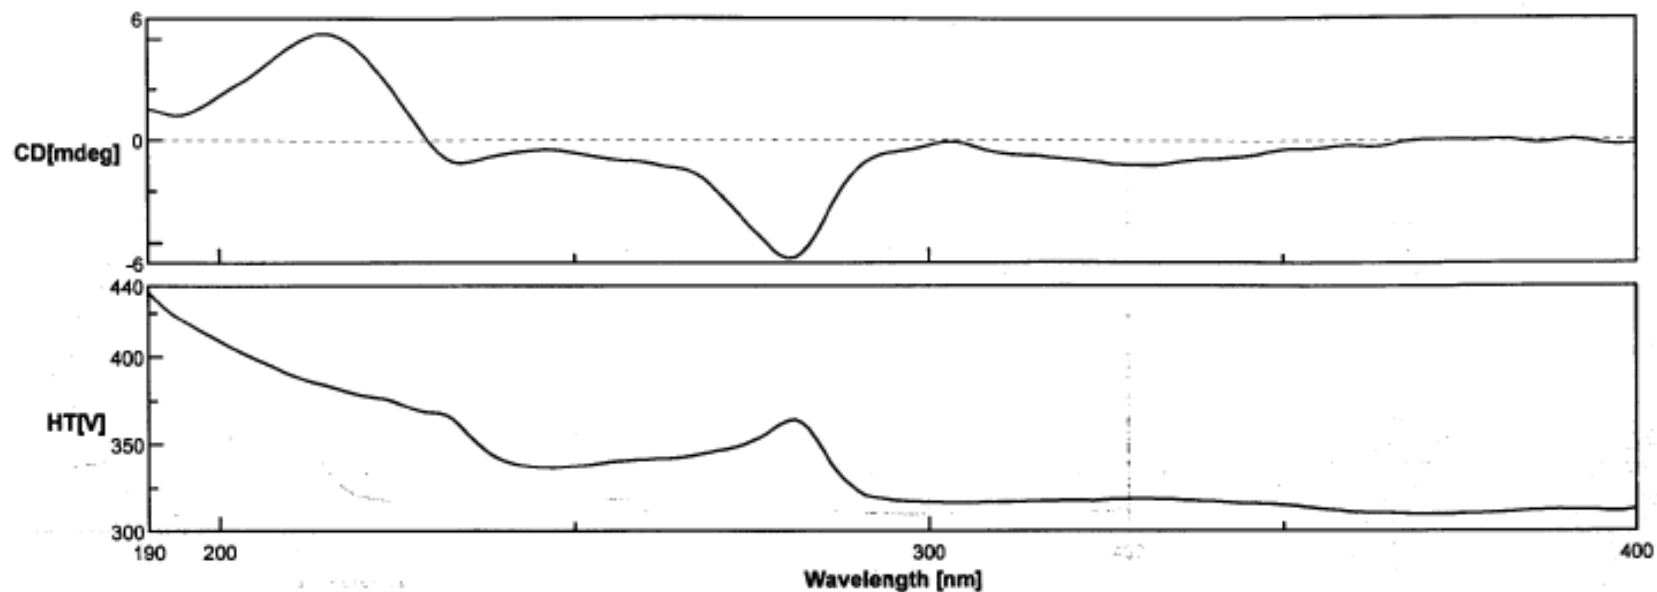

Date 2009/9/28 15:06  
Model J-810  
Serial No. B027760750  
Band width 1 nm  
Response 1 sec  
Sensitivity Standard  
Measurement range 400 - 190 nm  
Data pitch 1nm  
Scanning speed 100 nm/min  
Accumulation 3  
Cell Length 0.05 cm  
Concentration 0.09 (w/v)%  
Solvent MeOH  
Temperature Room Temperature  
Sample name 1583-111-10

File name 1583-111-10S.jws

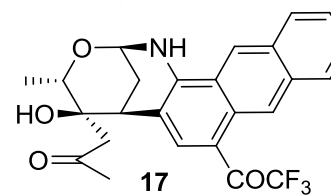

Compound 8

<sup>1</sup>H-NMR

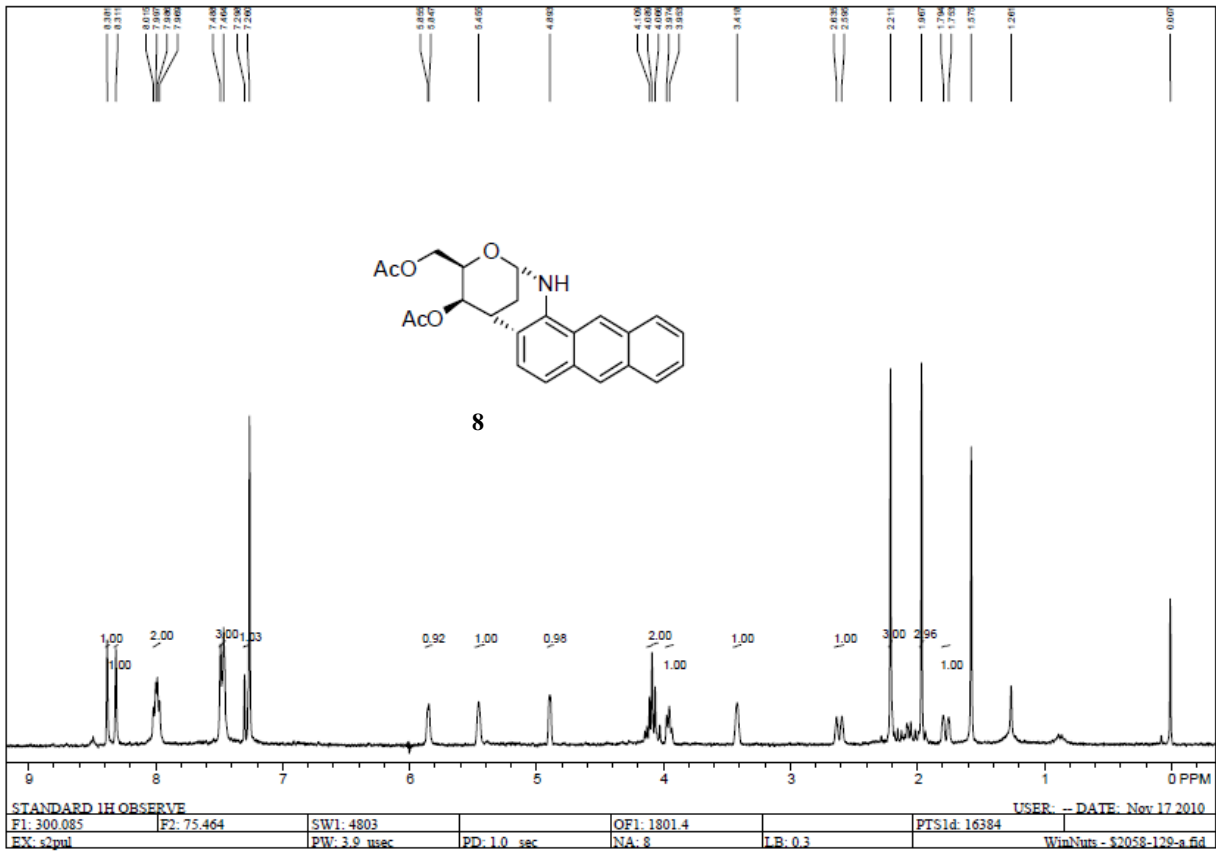

<sup>13</sup>C-NMR

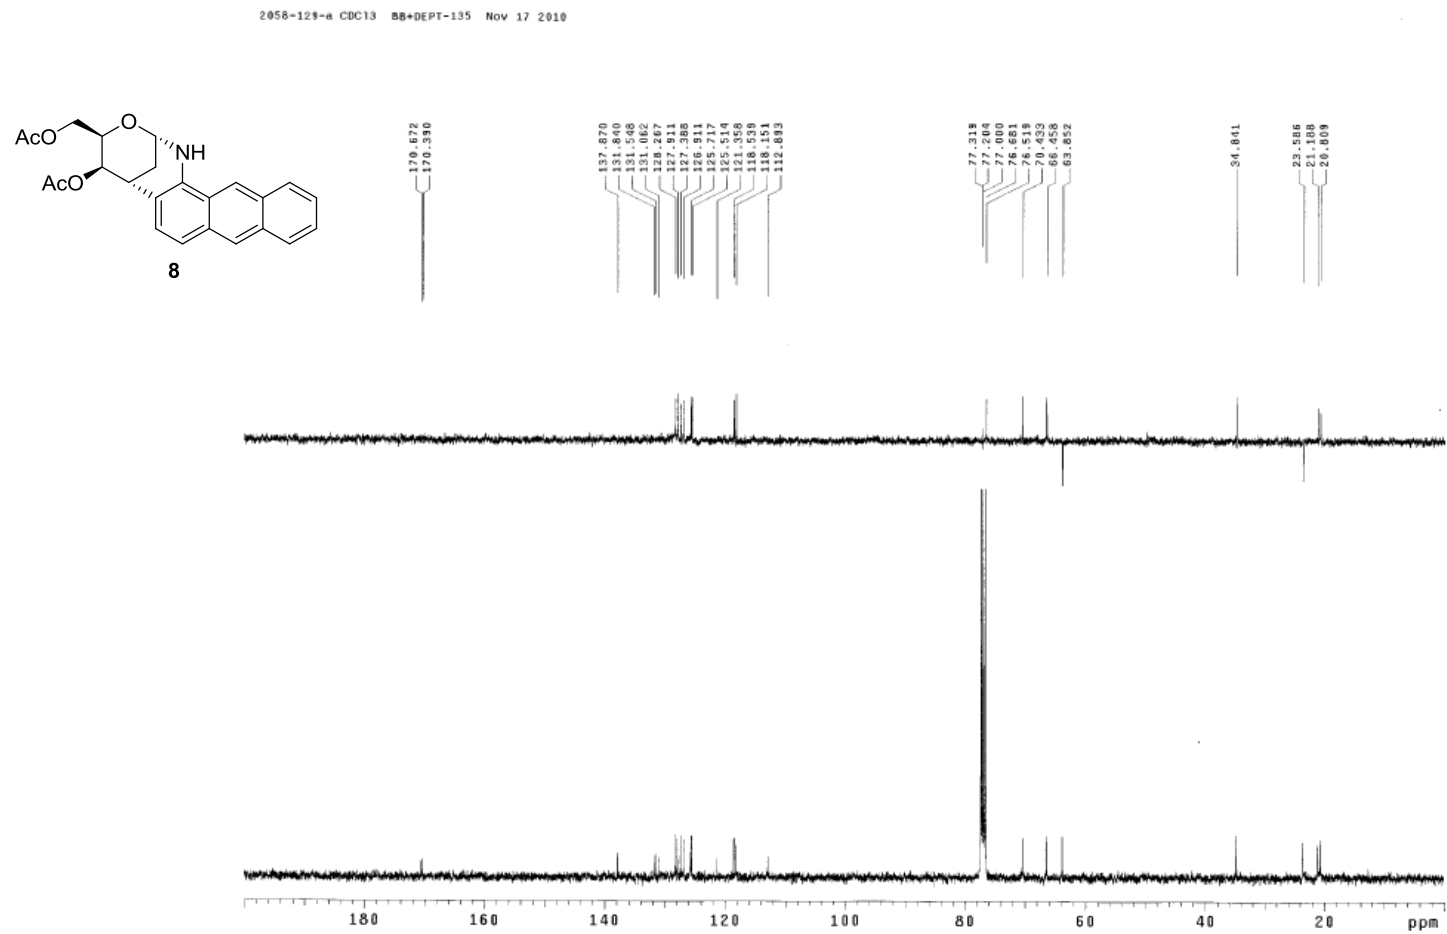

<sup>1</sup>H-NMR

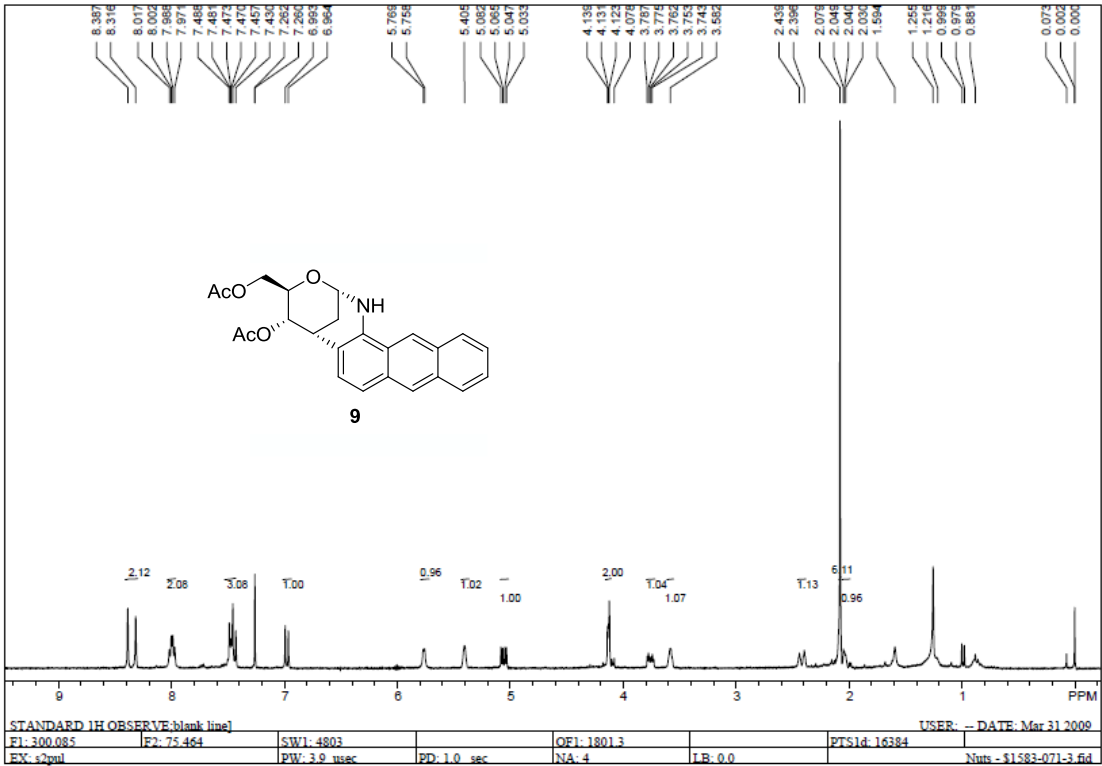

<sup>13</sup>C-NMR

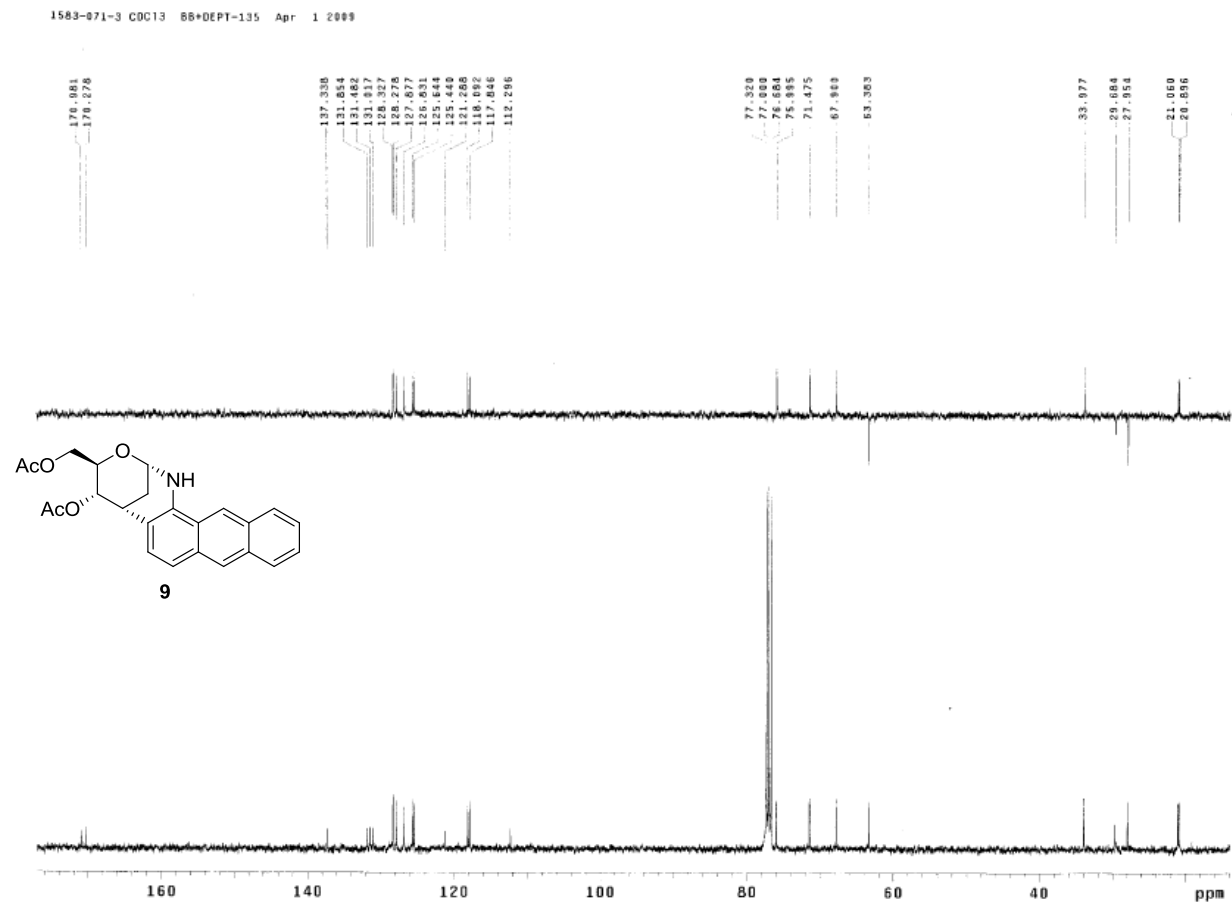

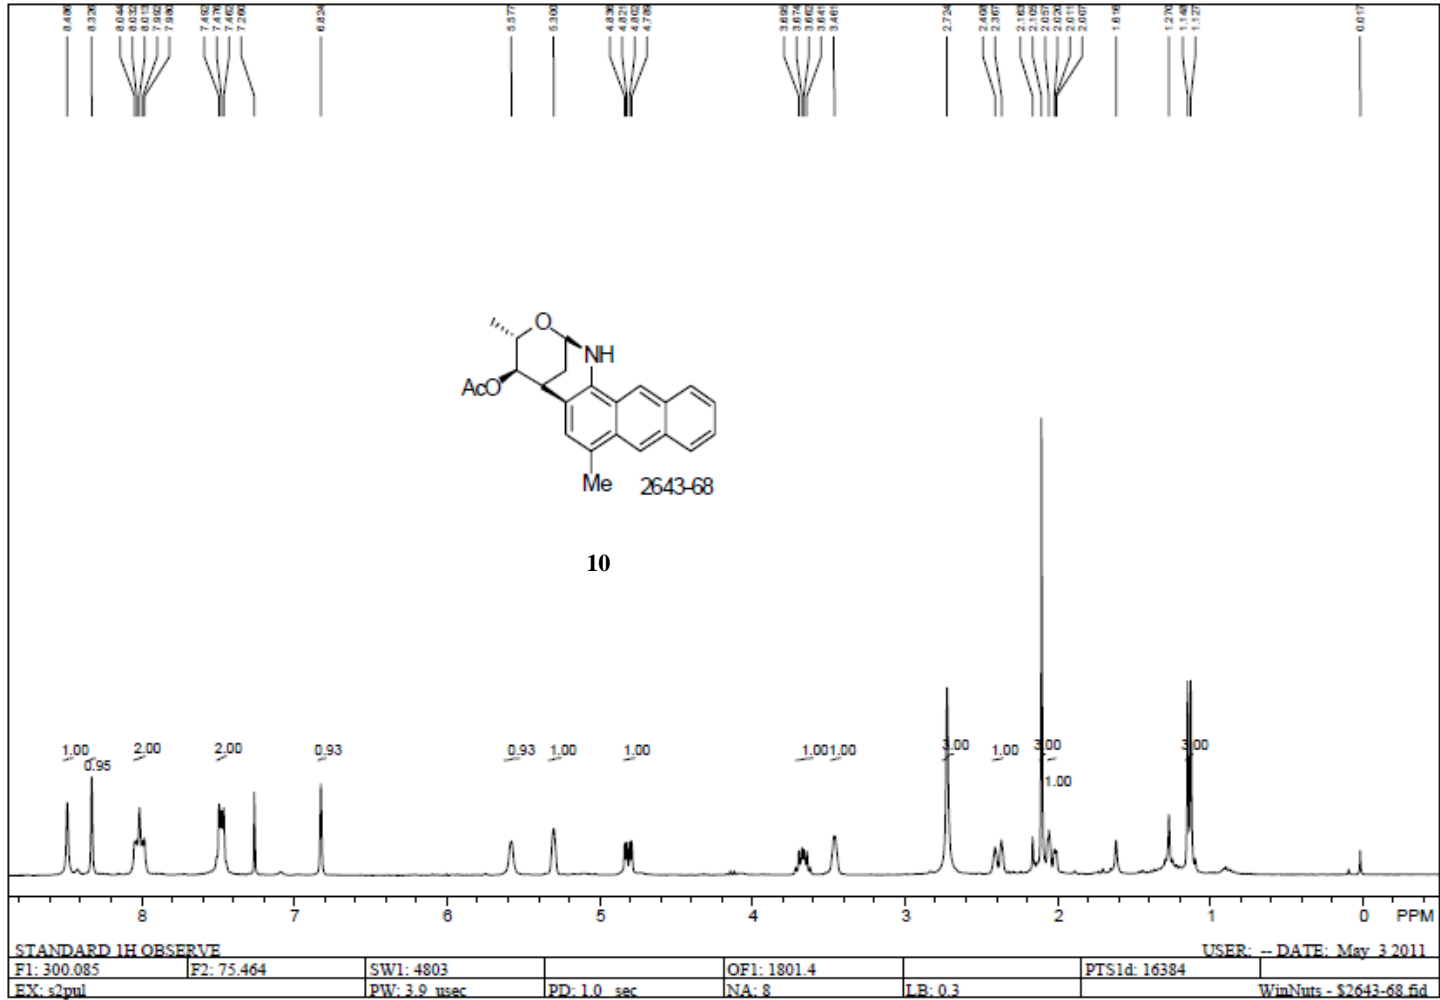

<sup>13</sup>C-NMR

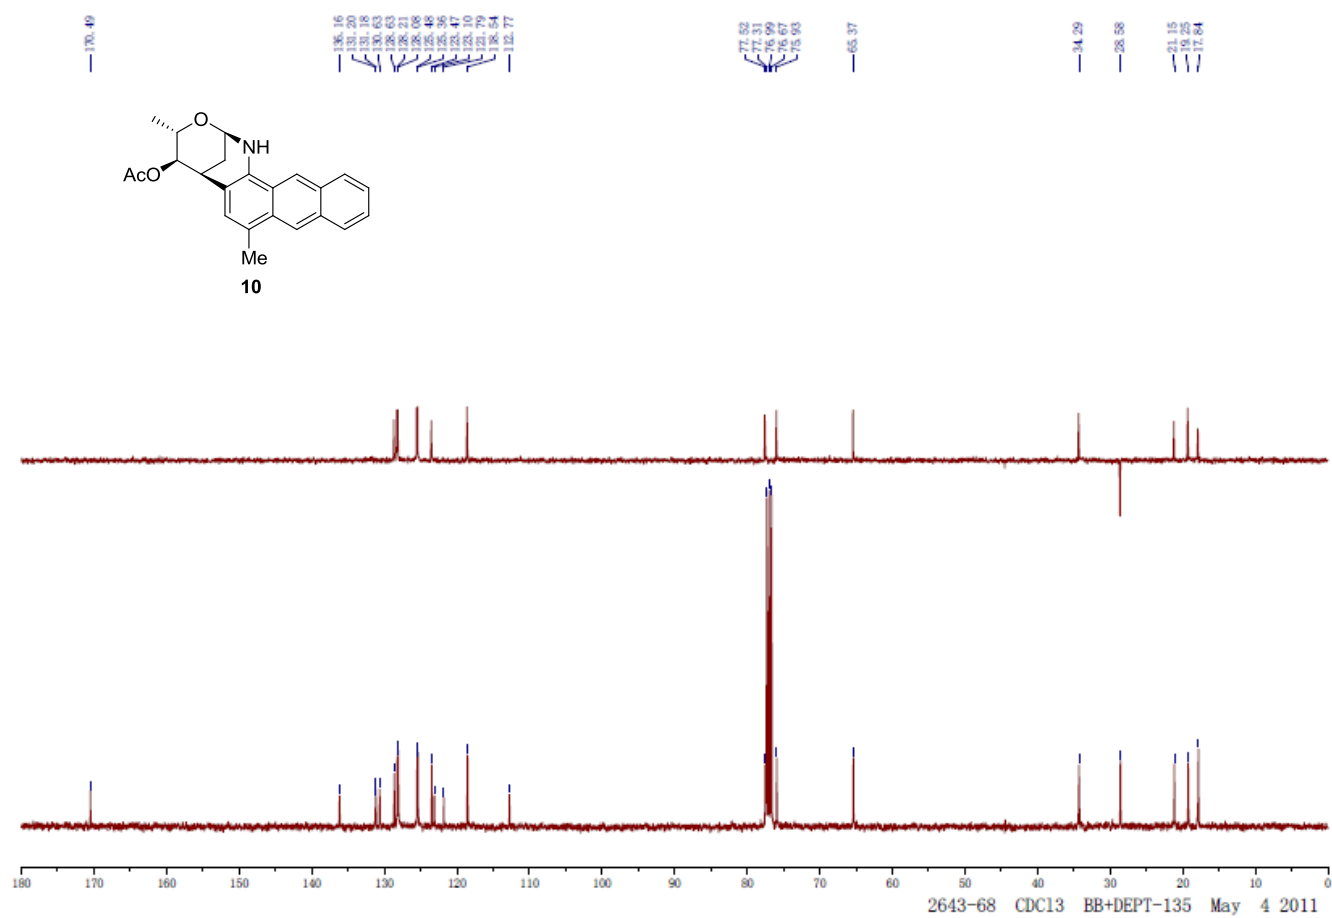

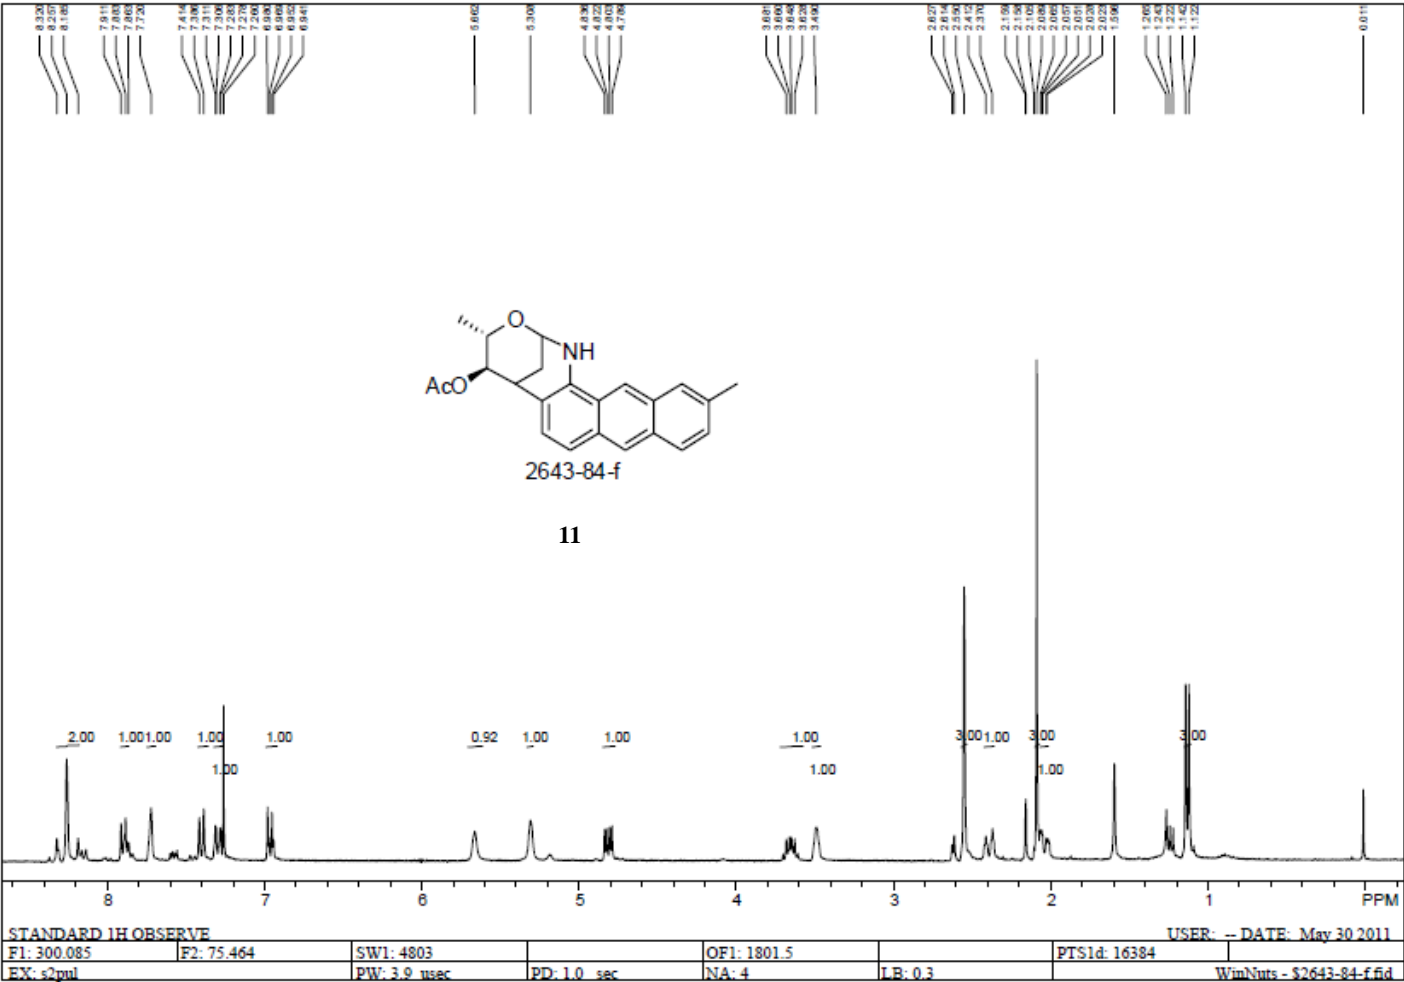



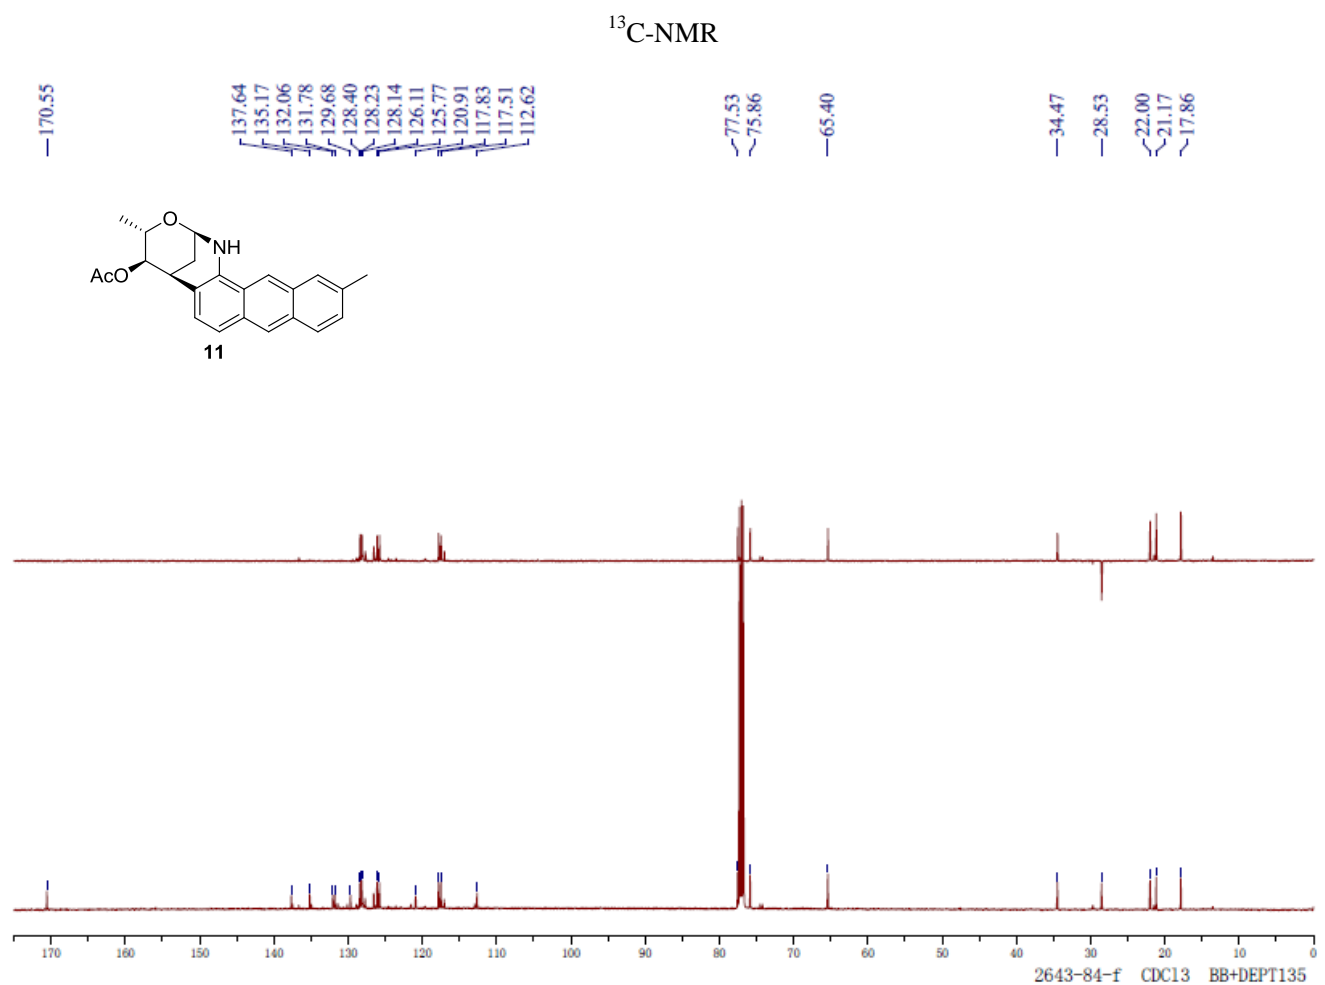

<sup>1</sup>H-NMR

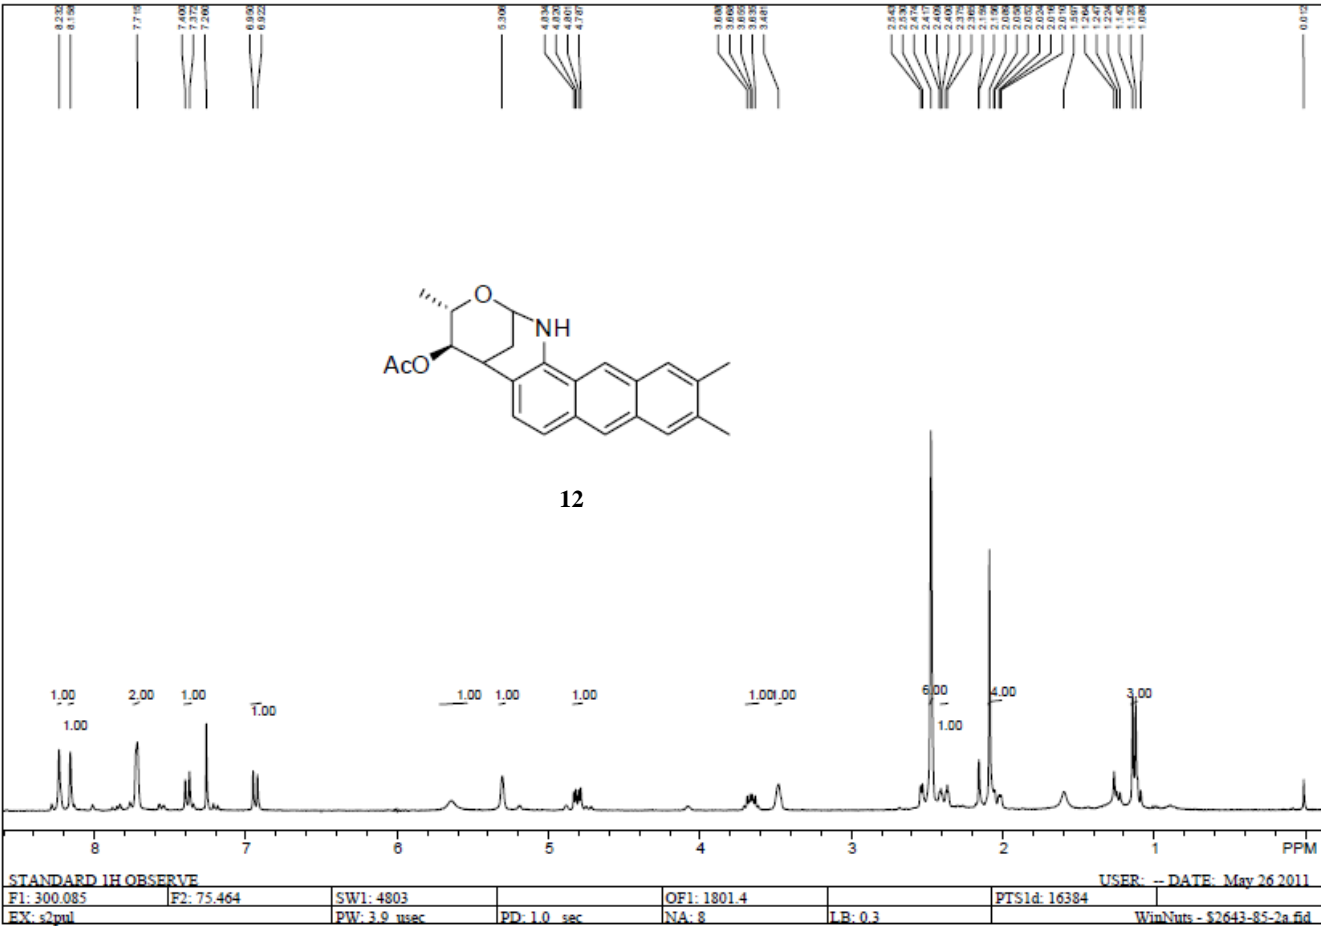

<sup>13</sup>C-NMR

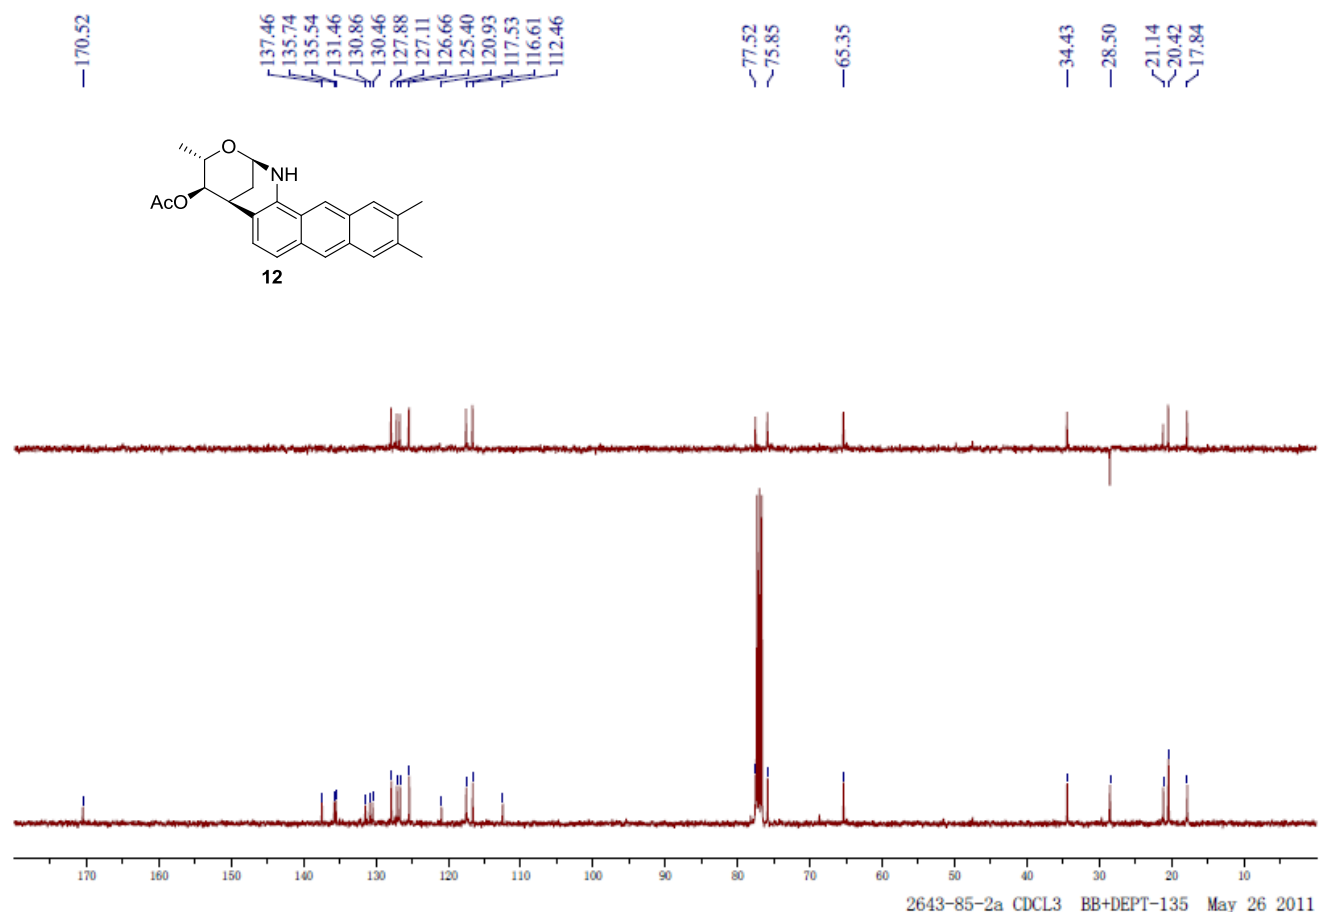

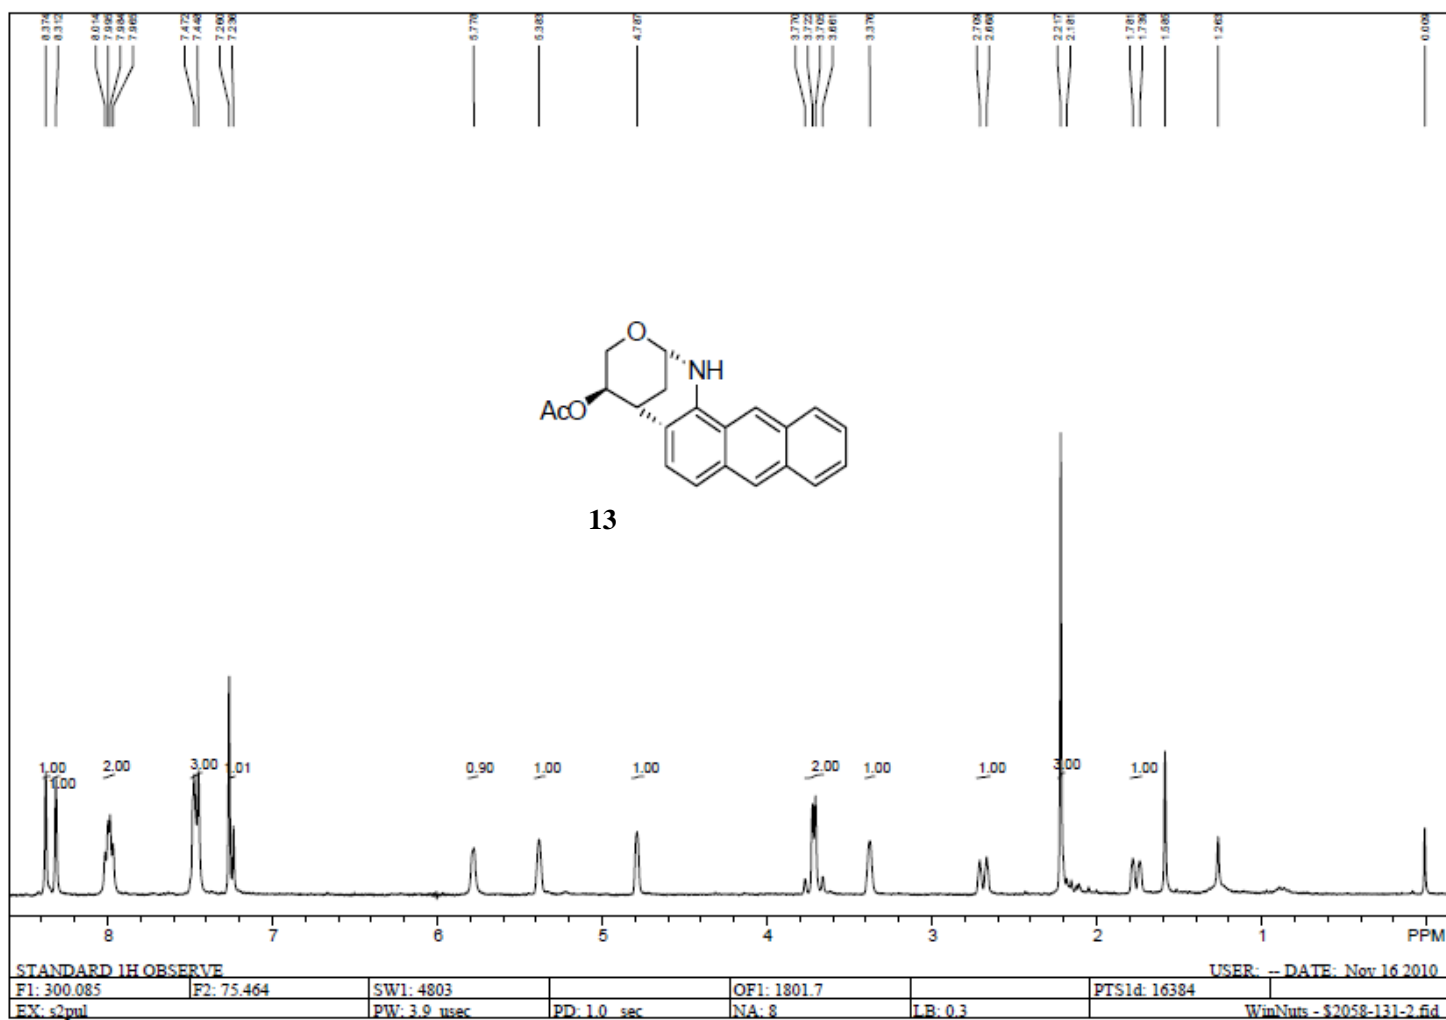

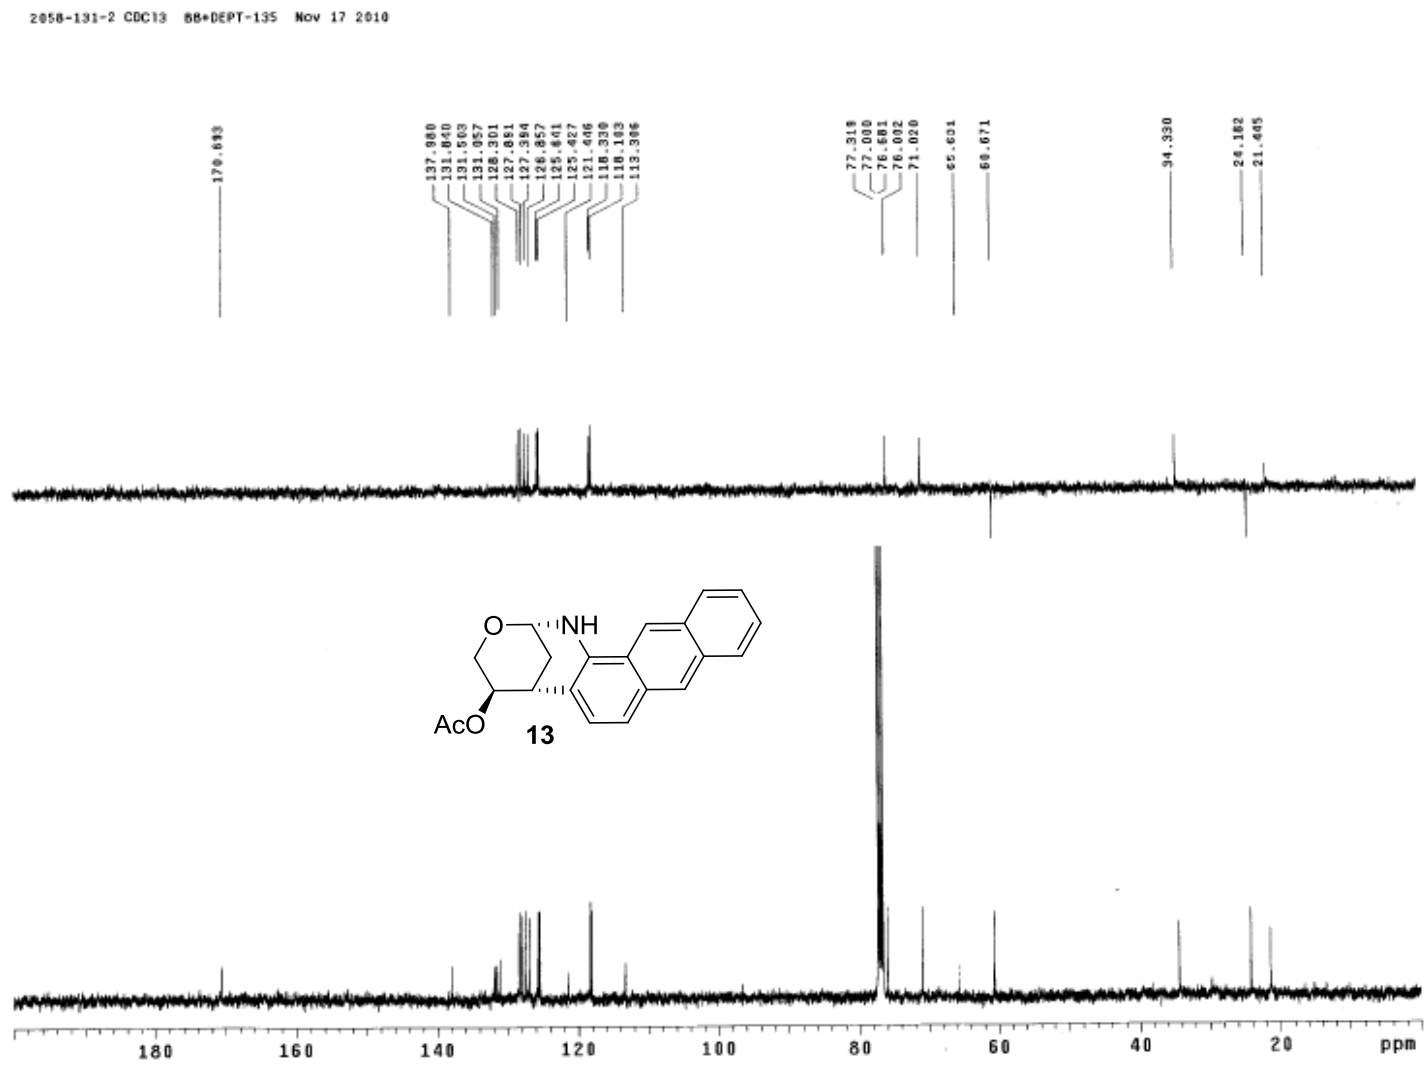

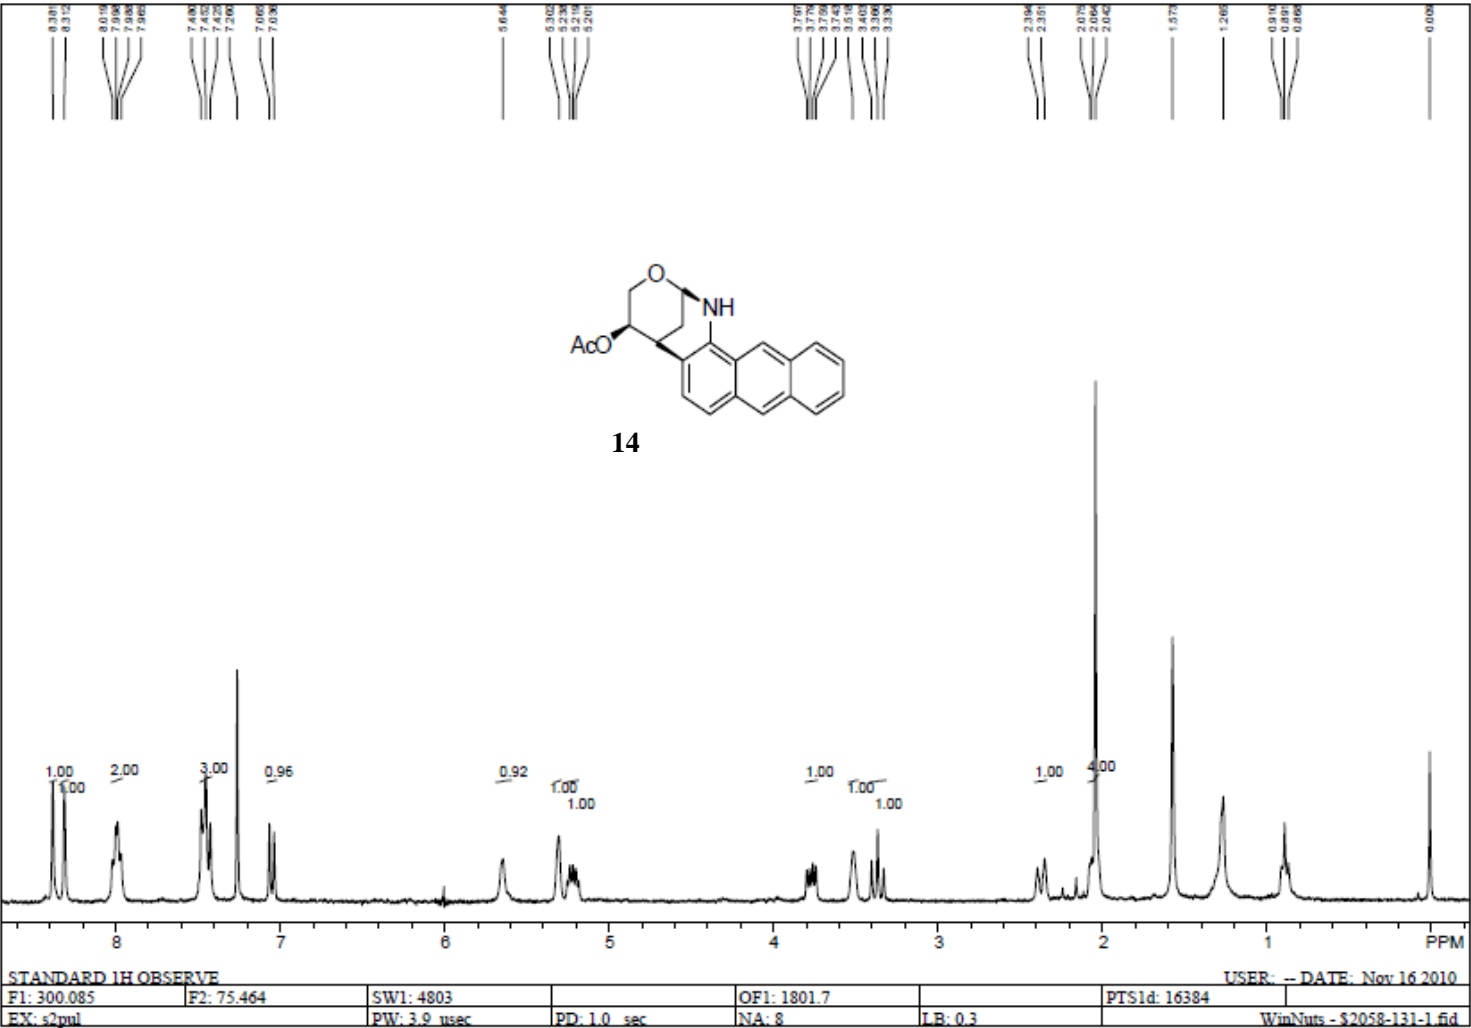

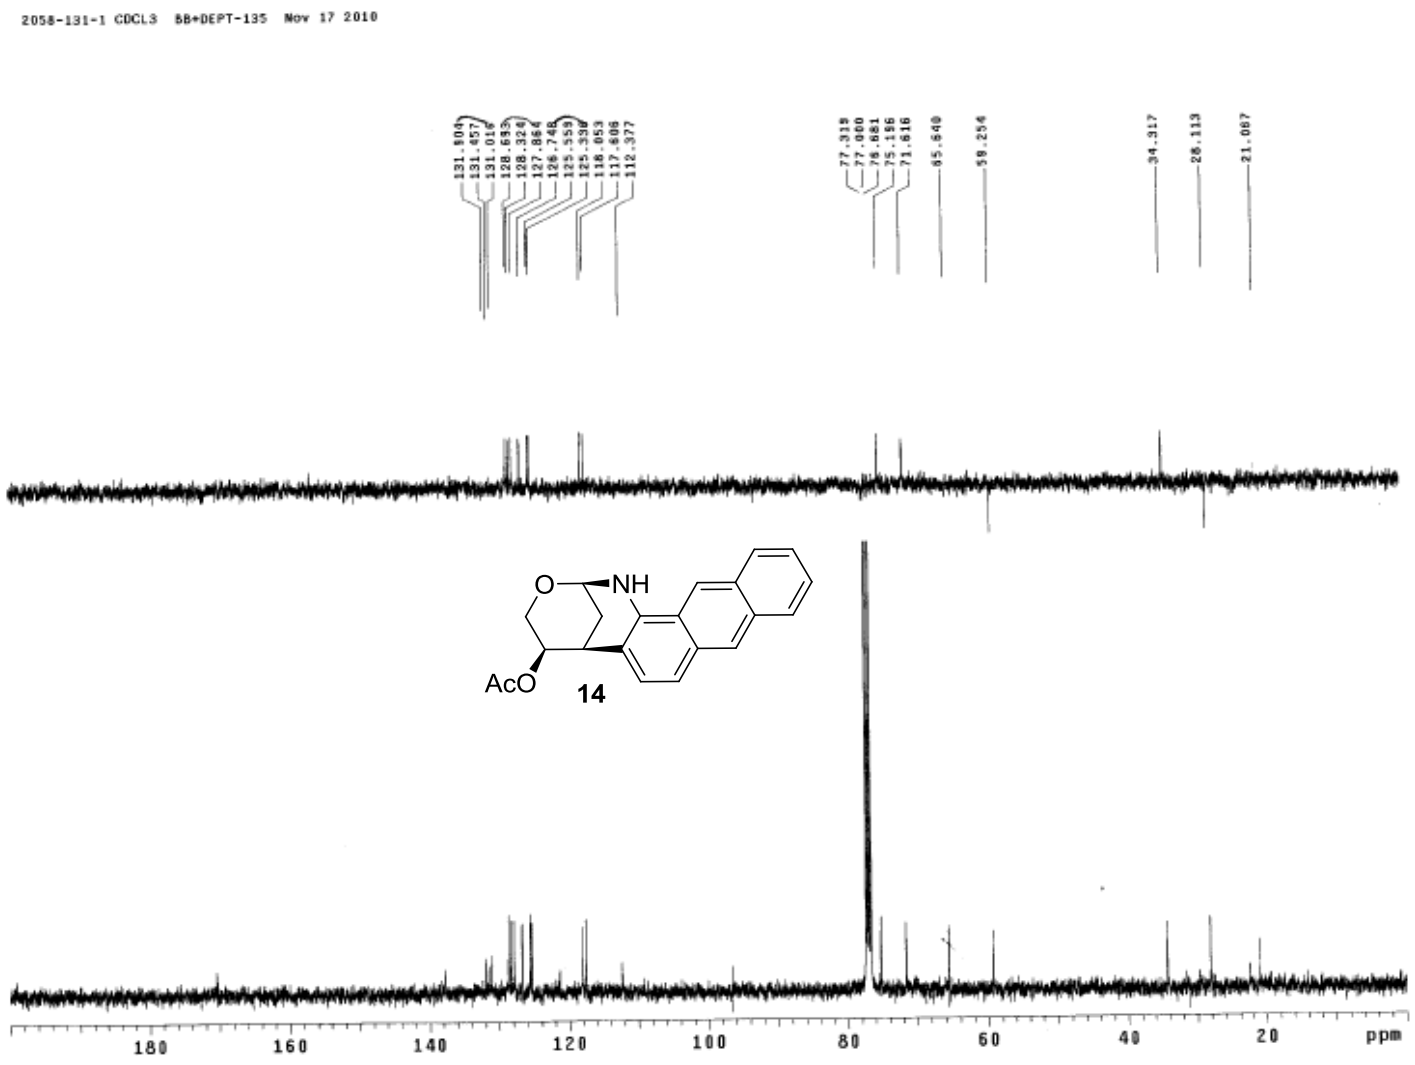

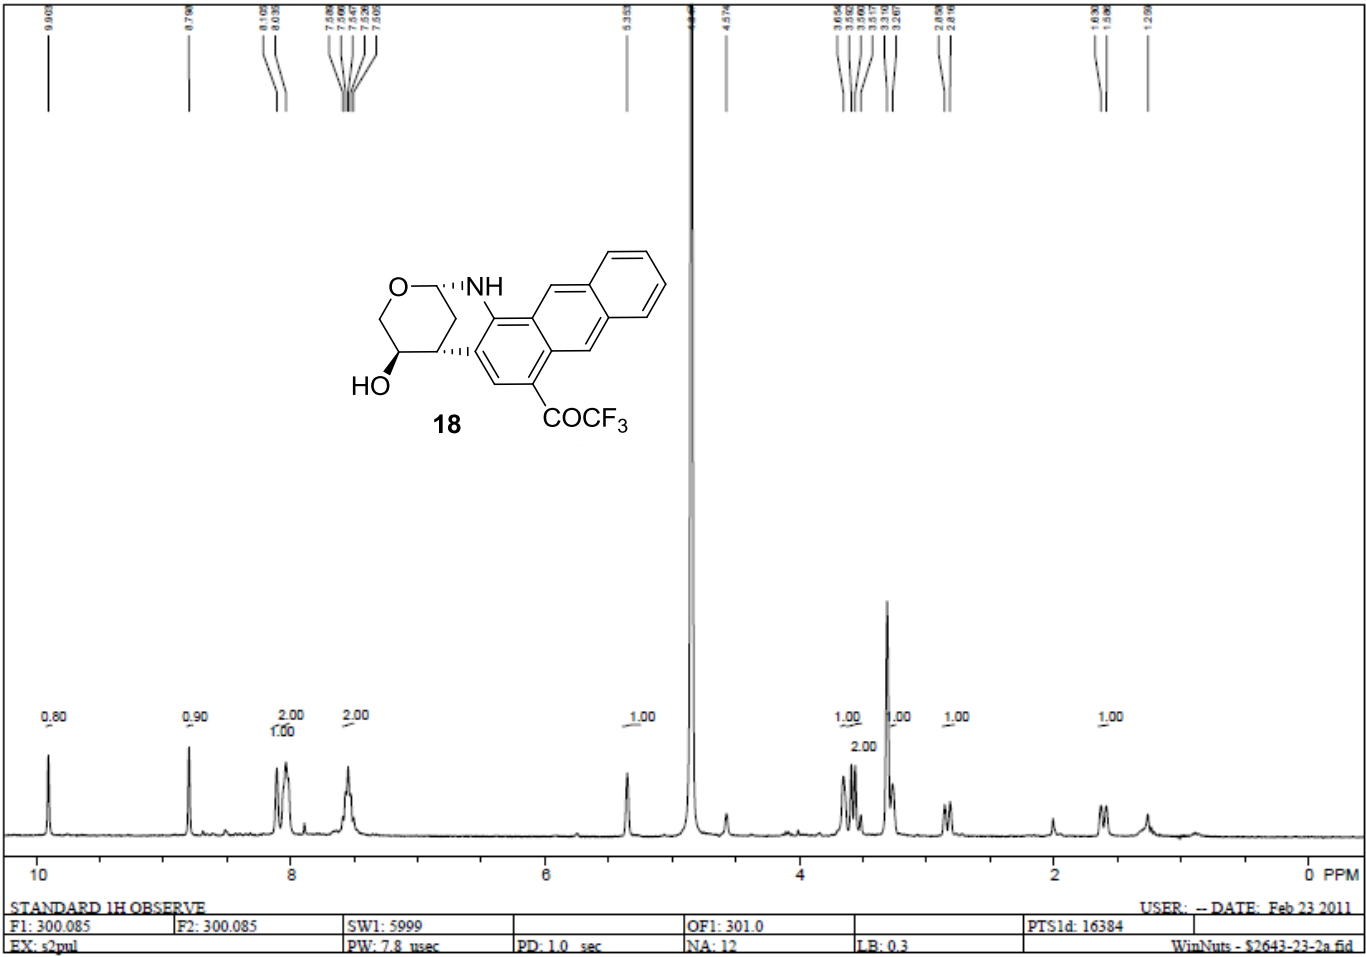



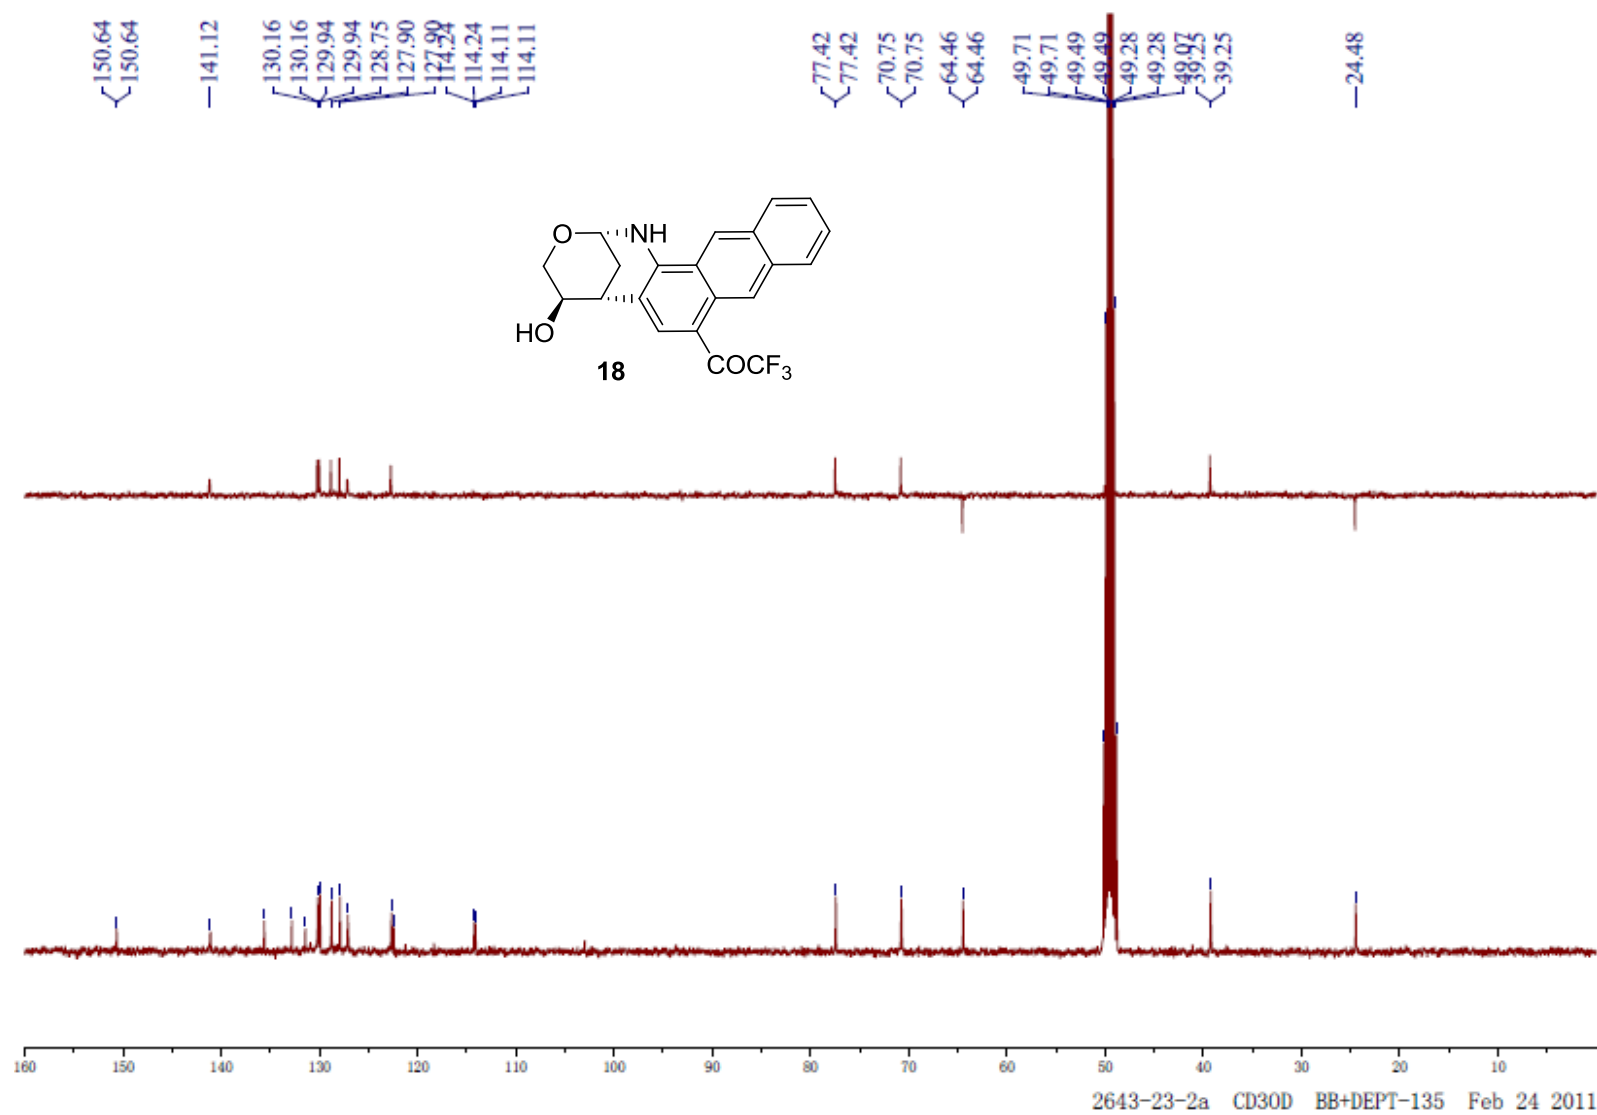

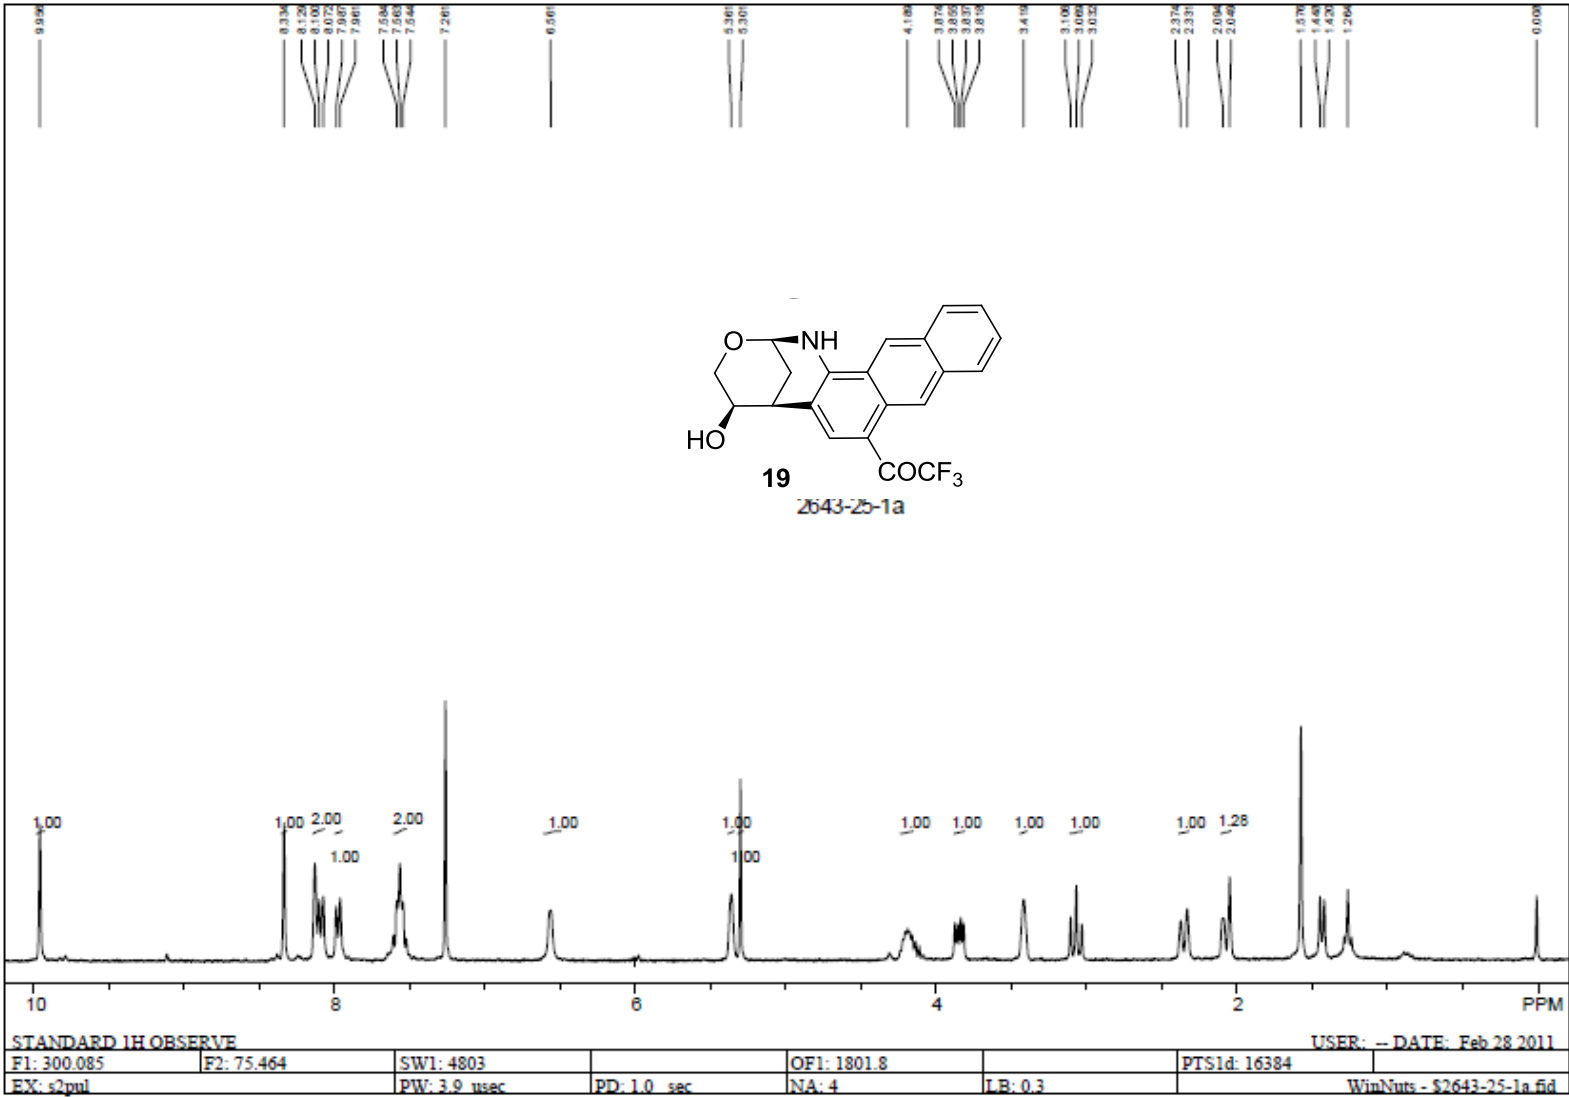

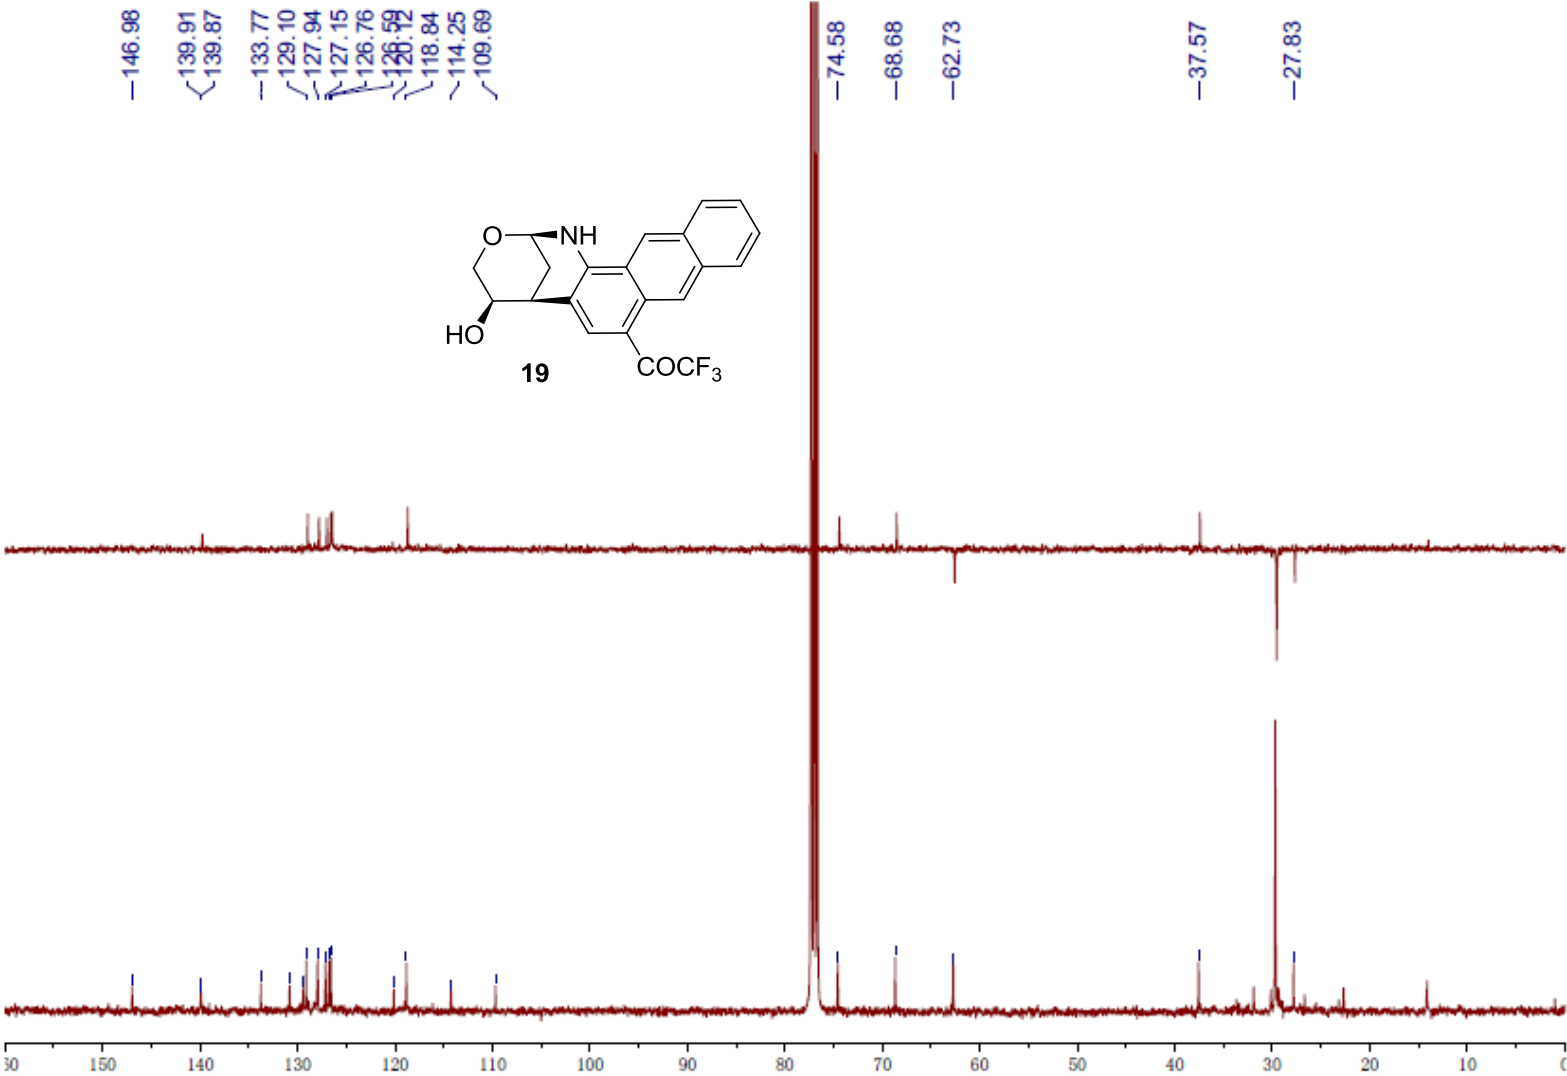

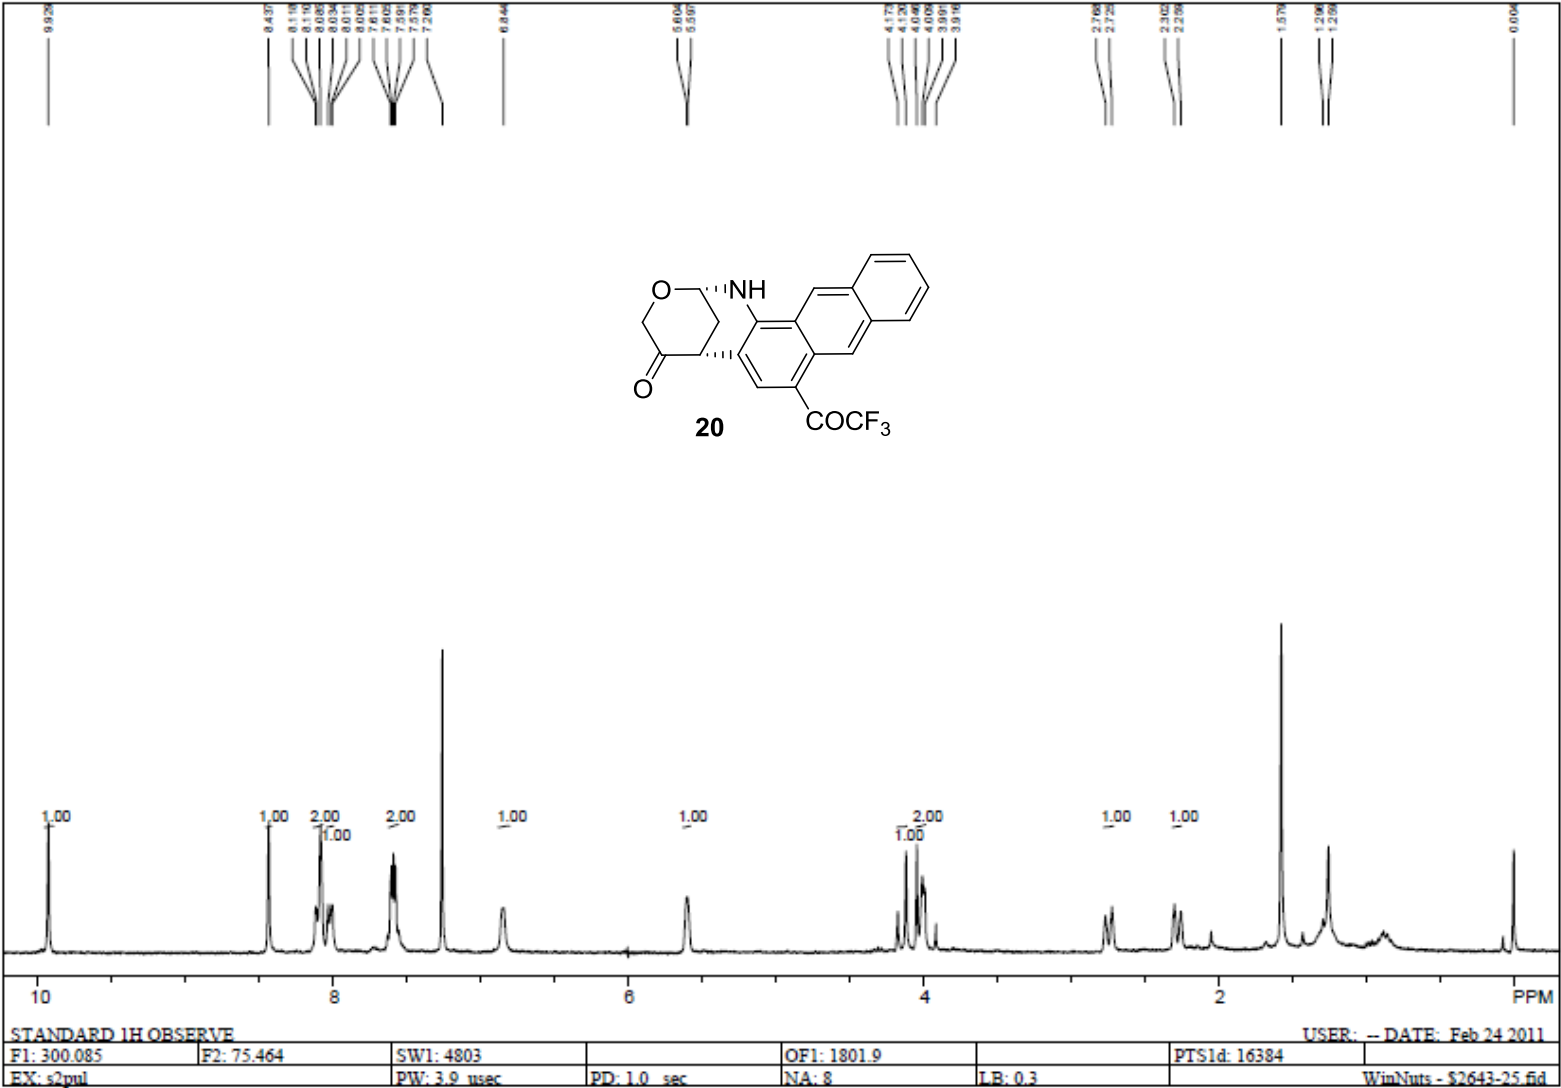

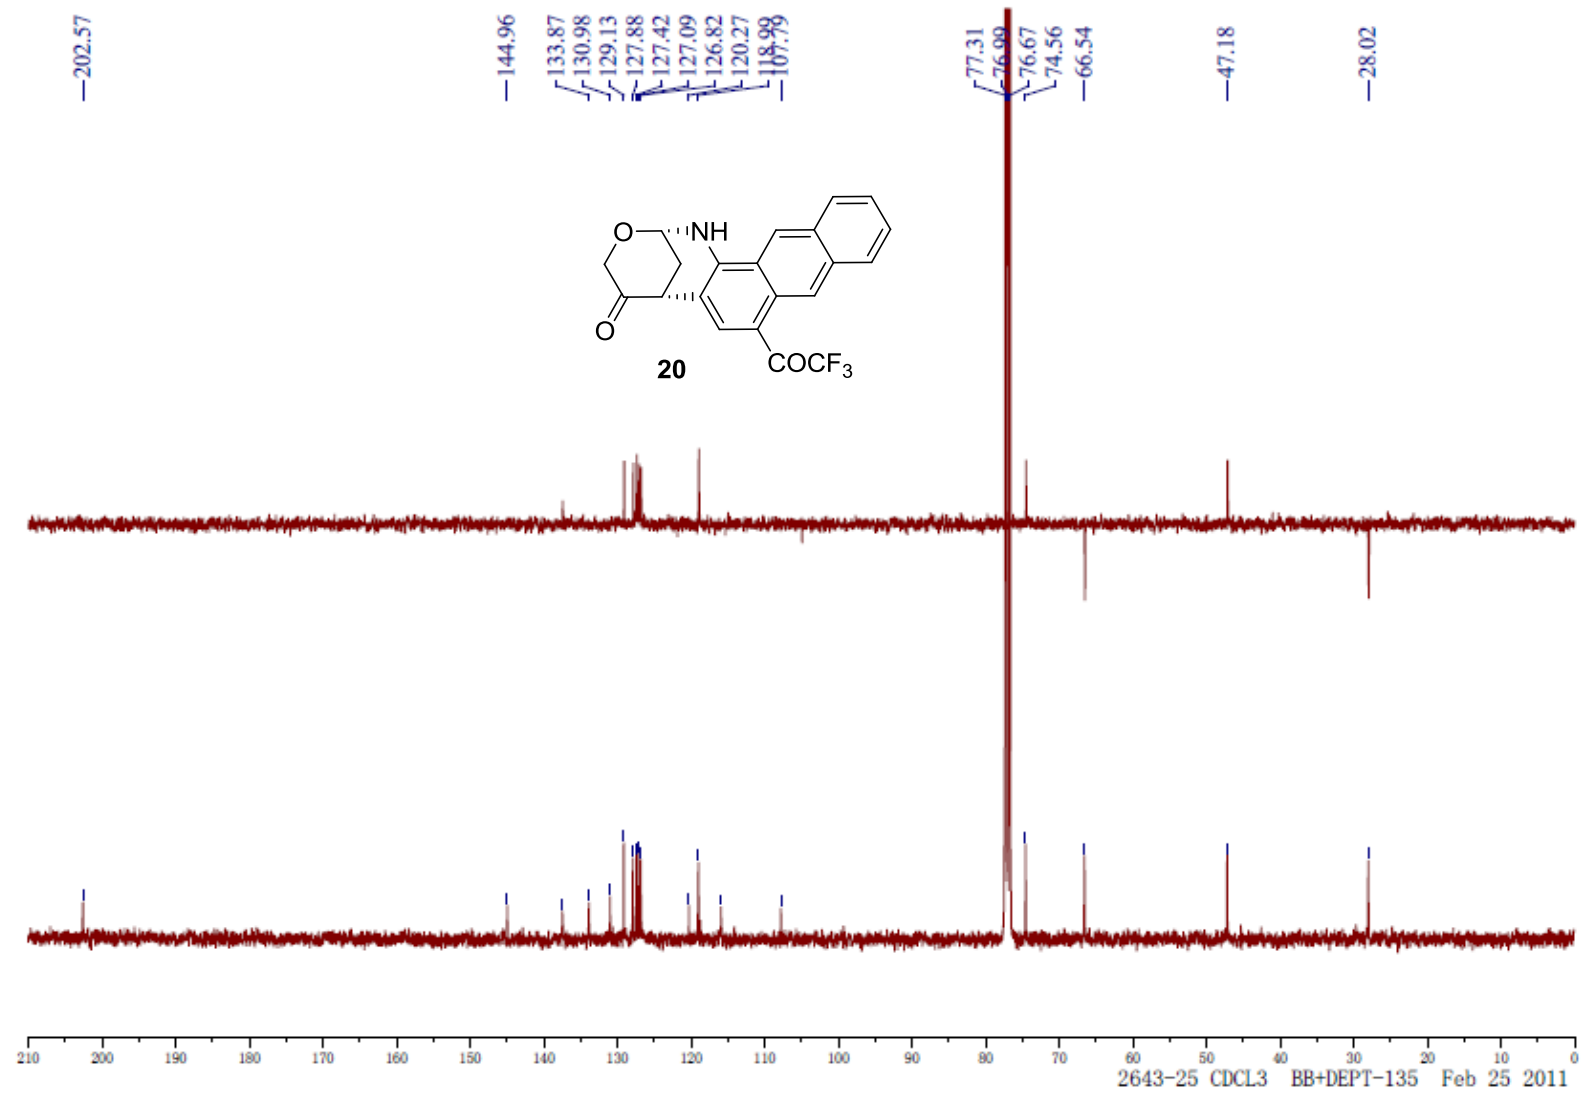

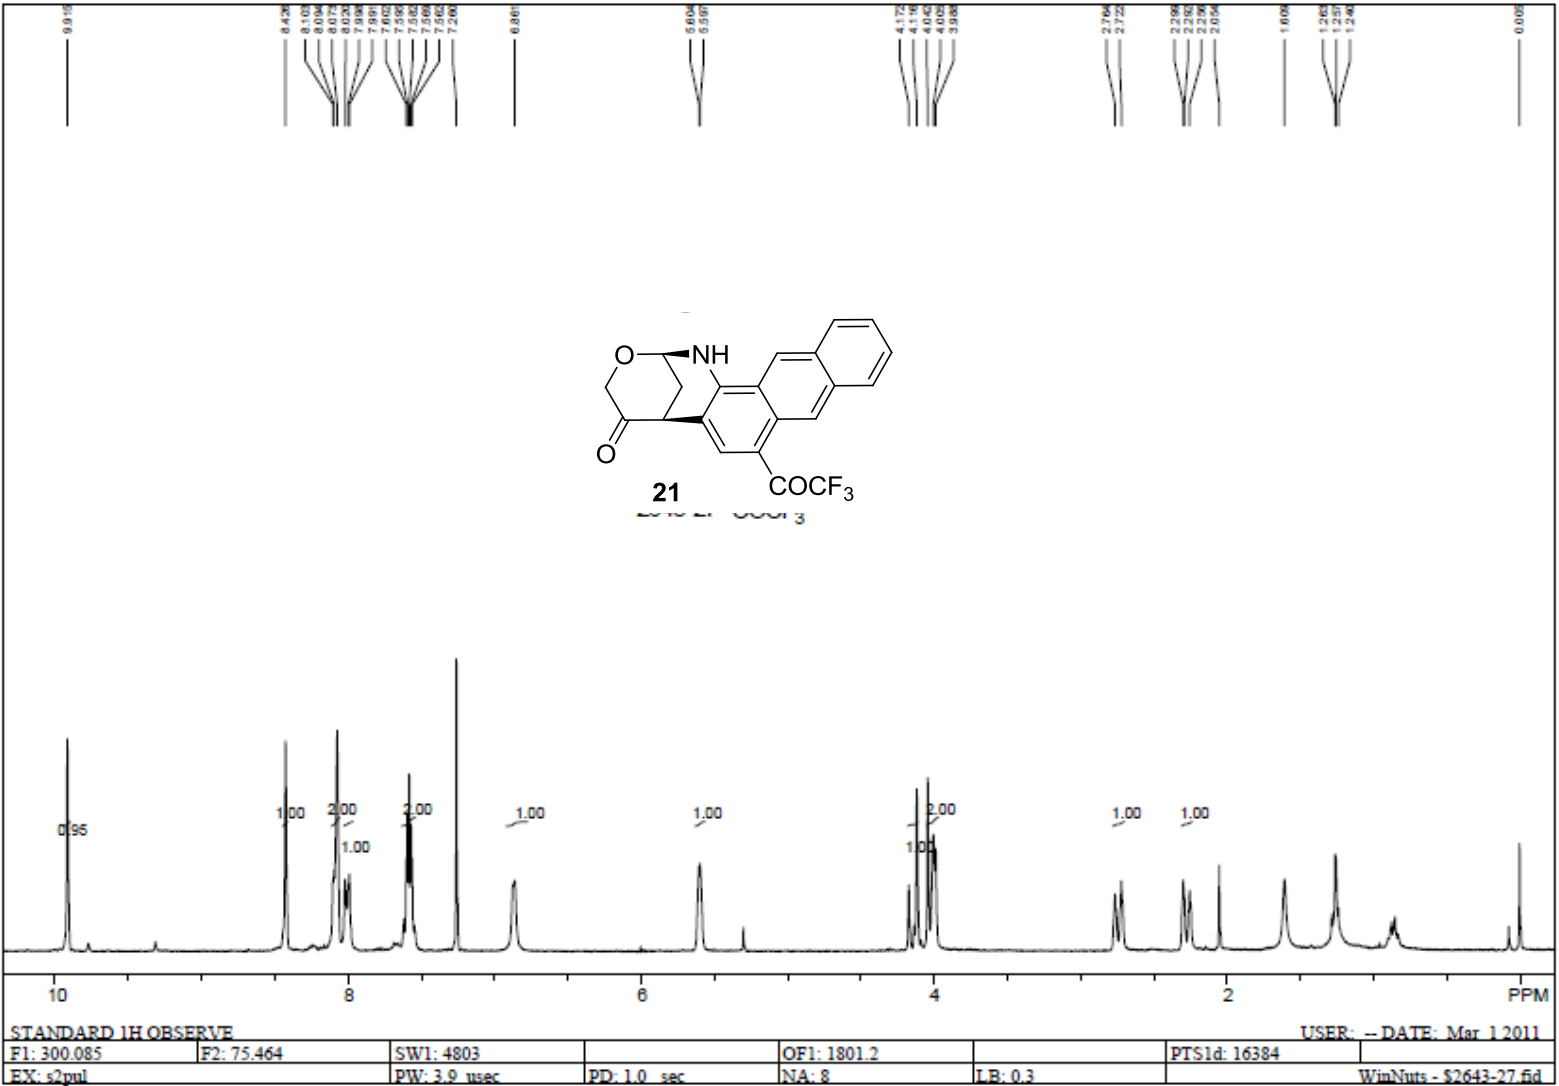

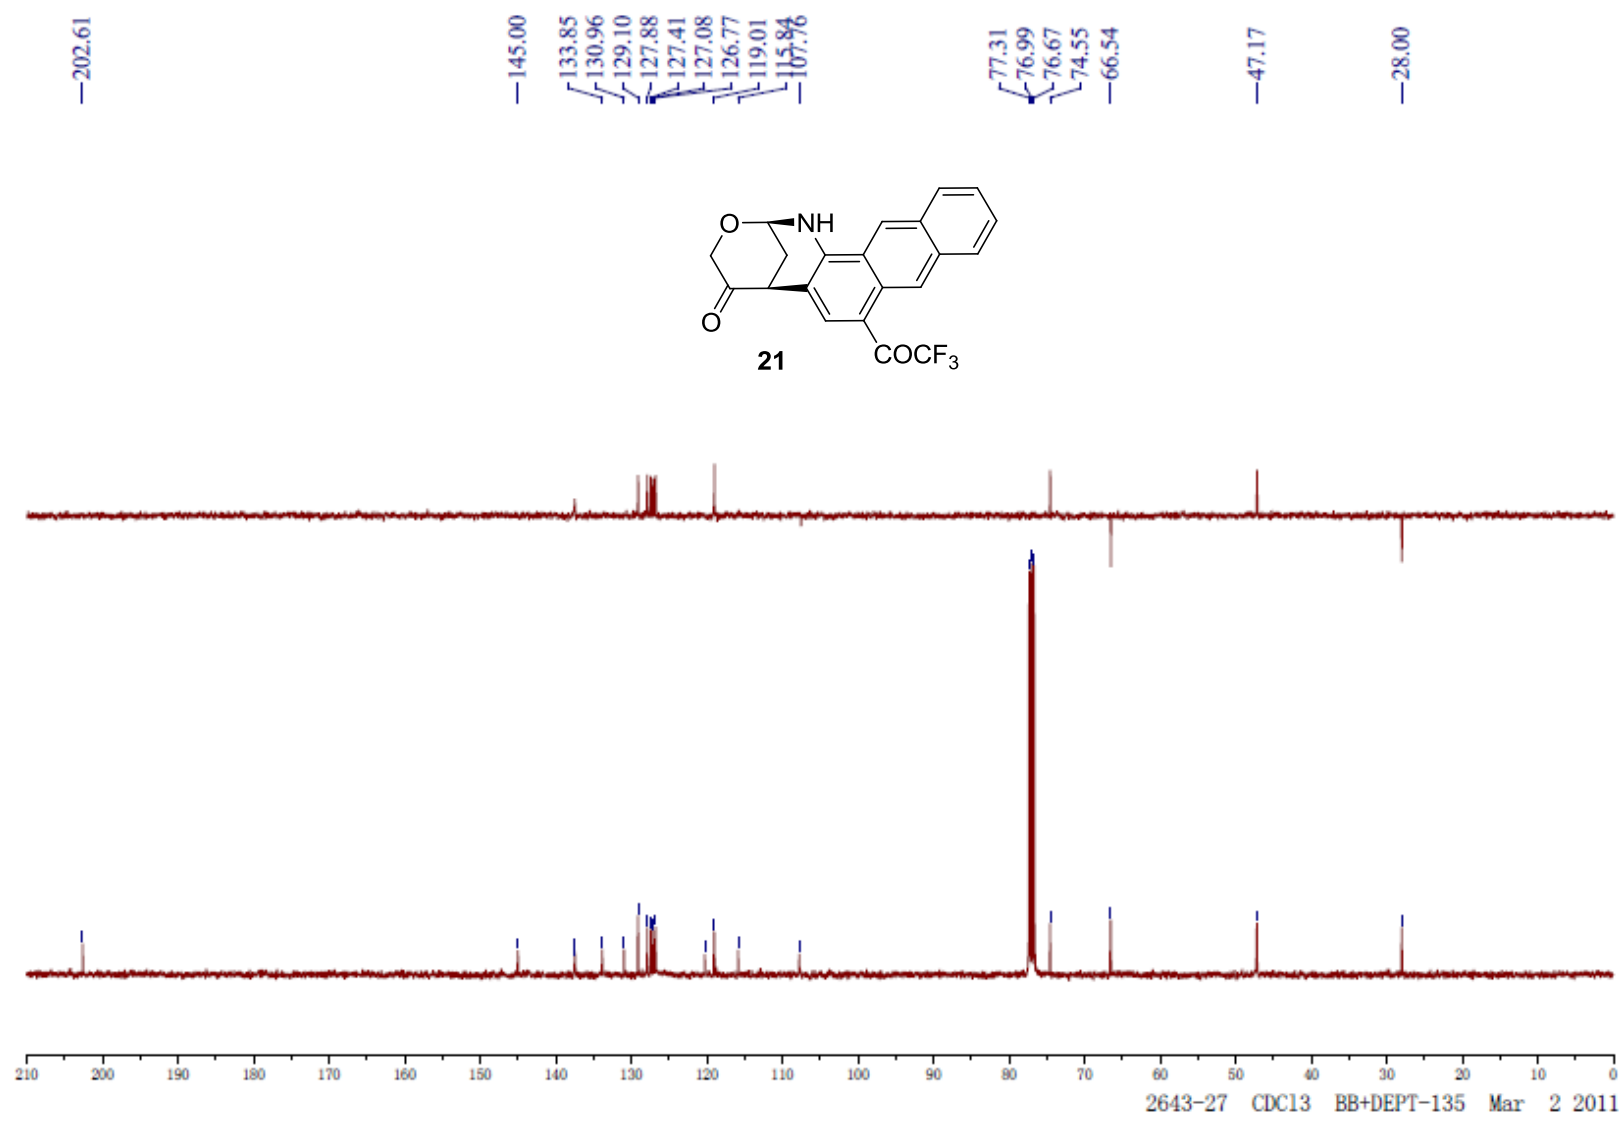

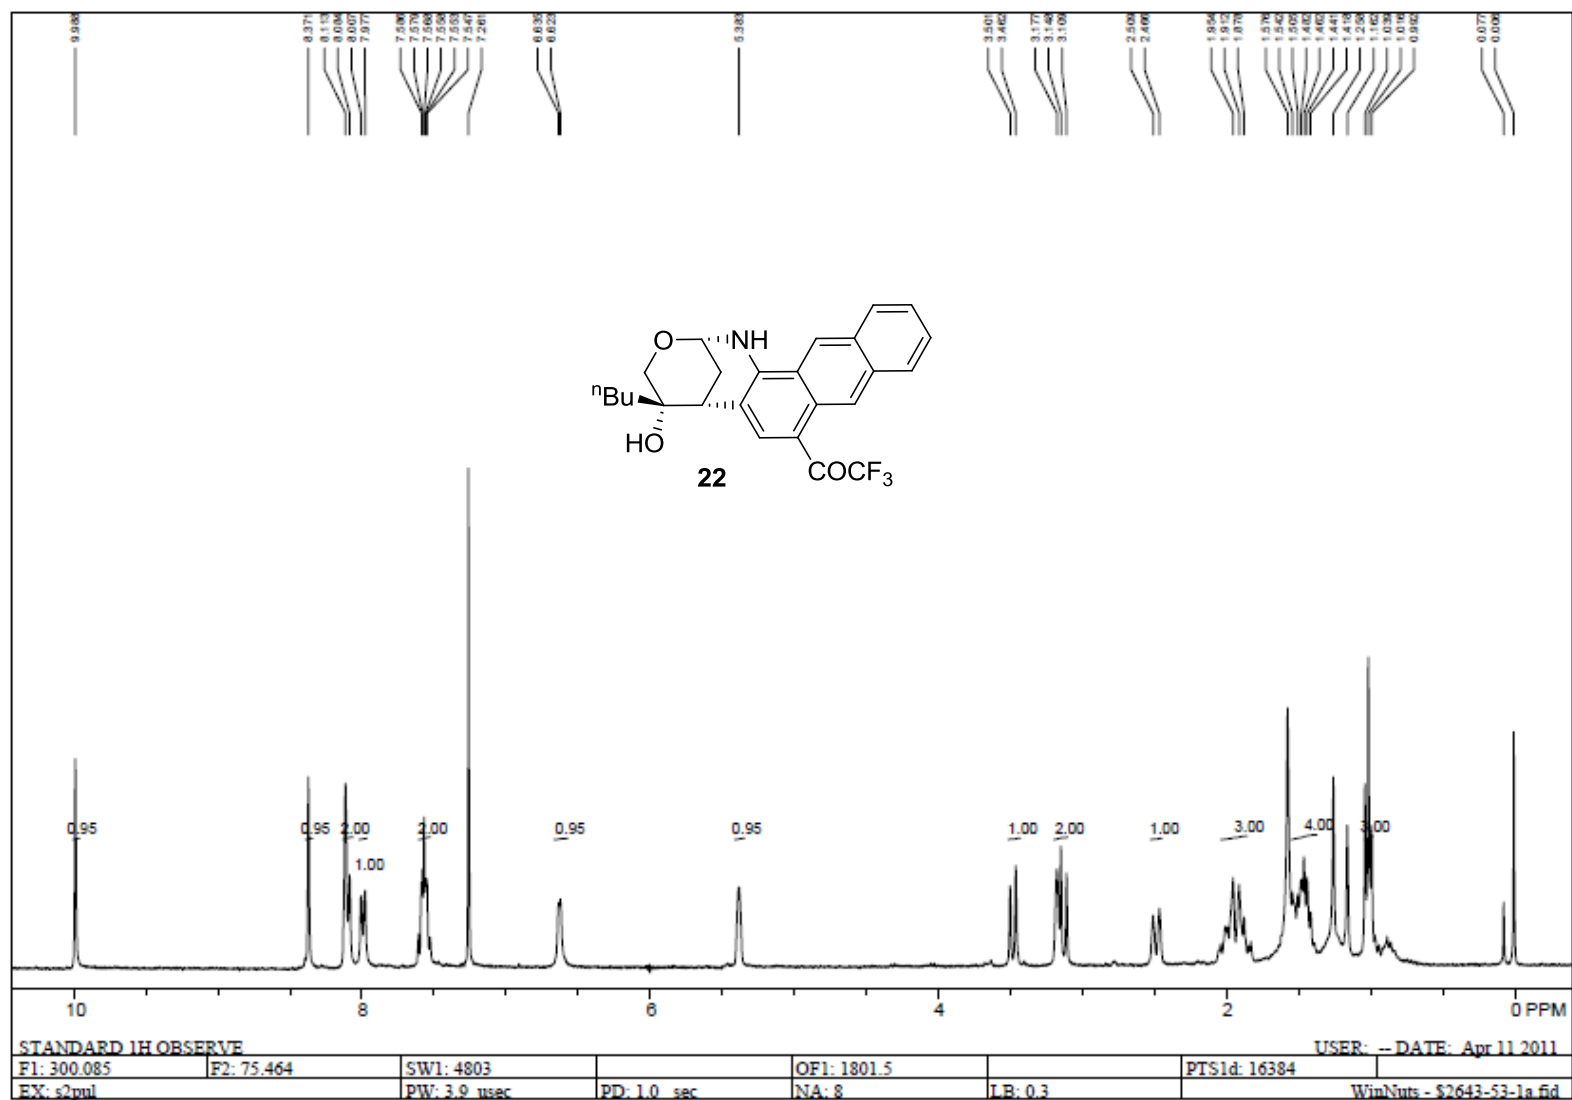



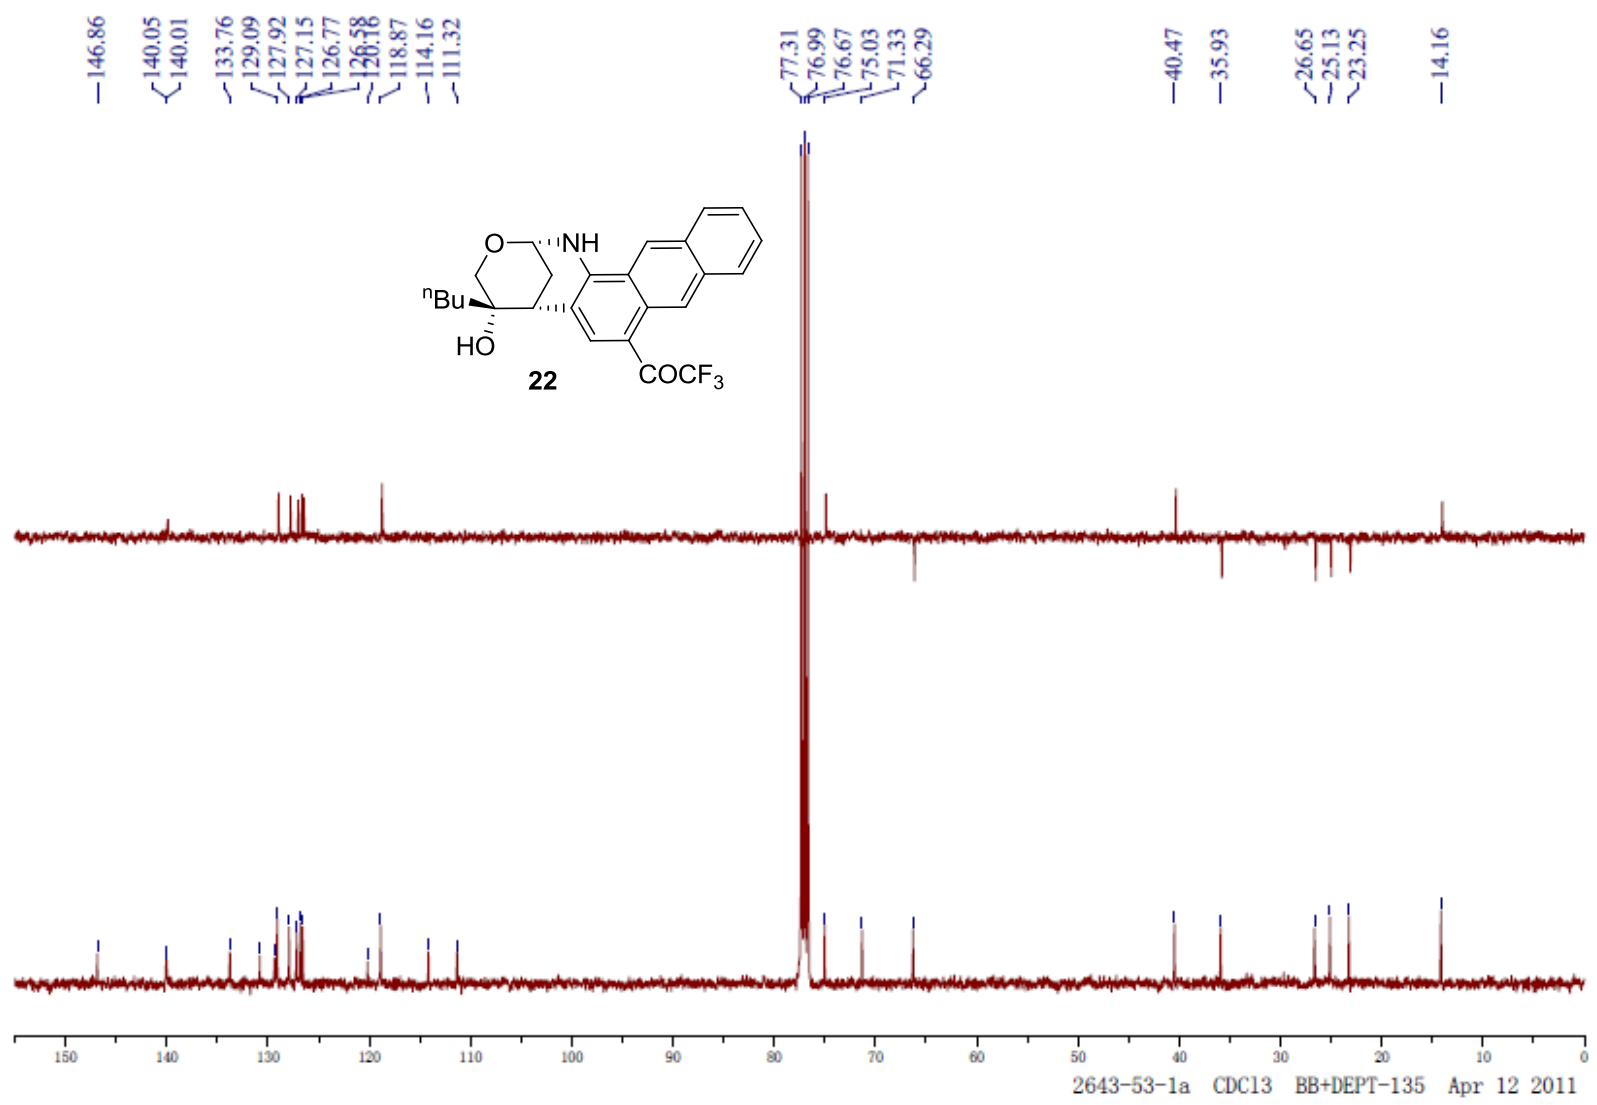

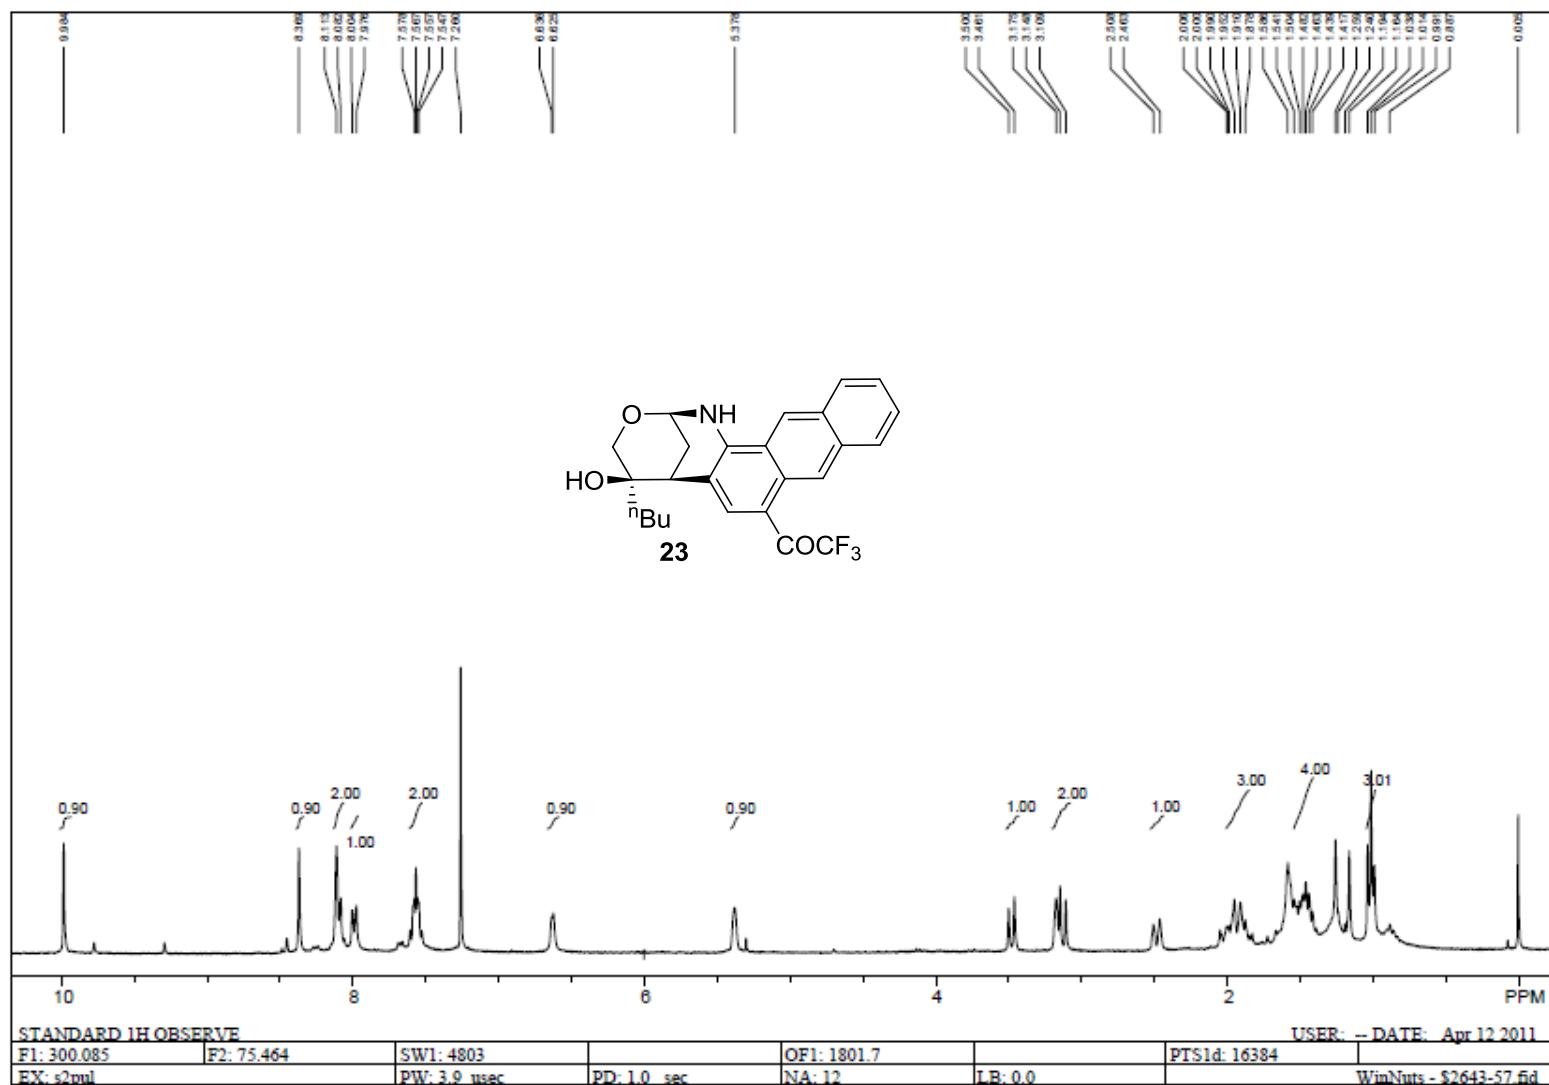

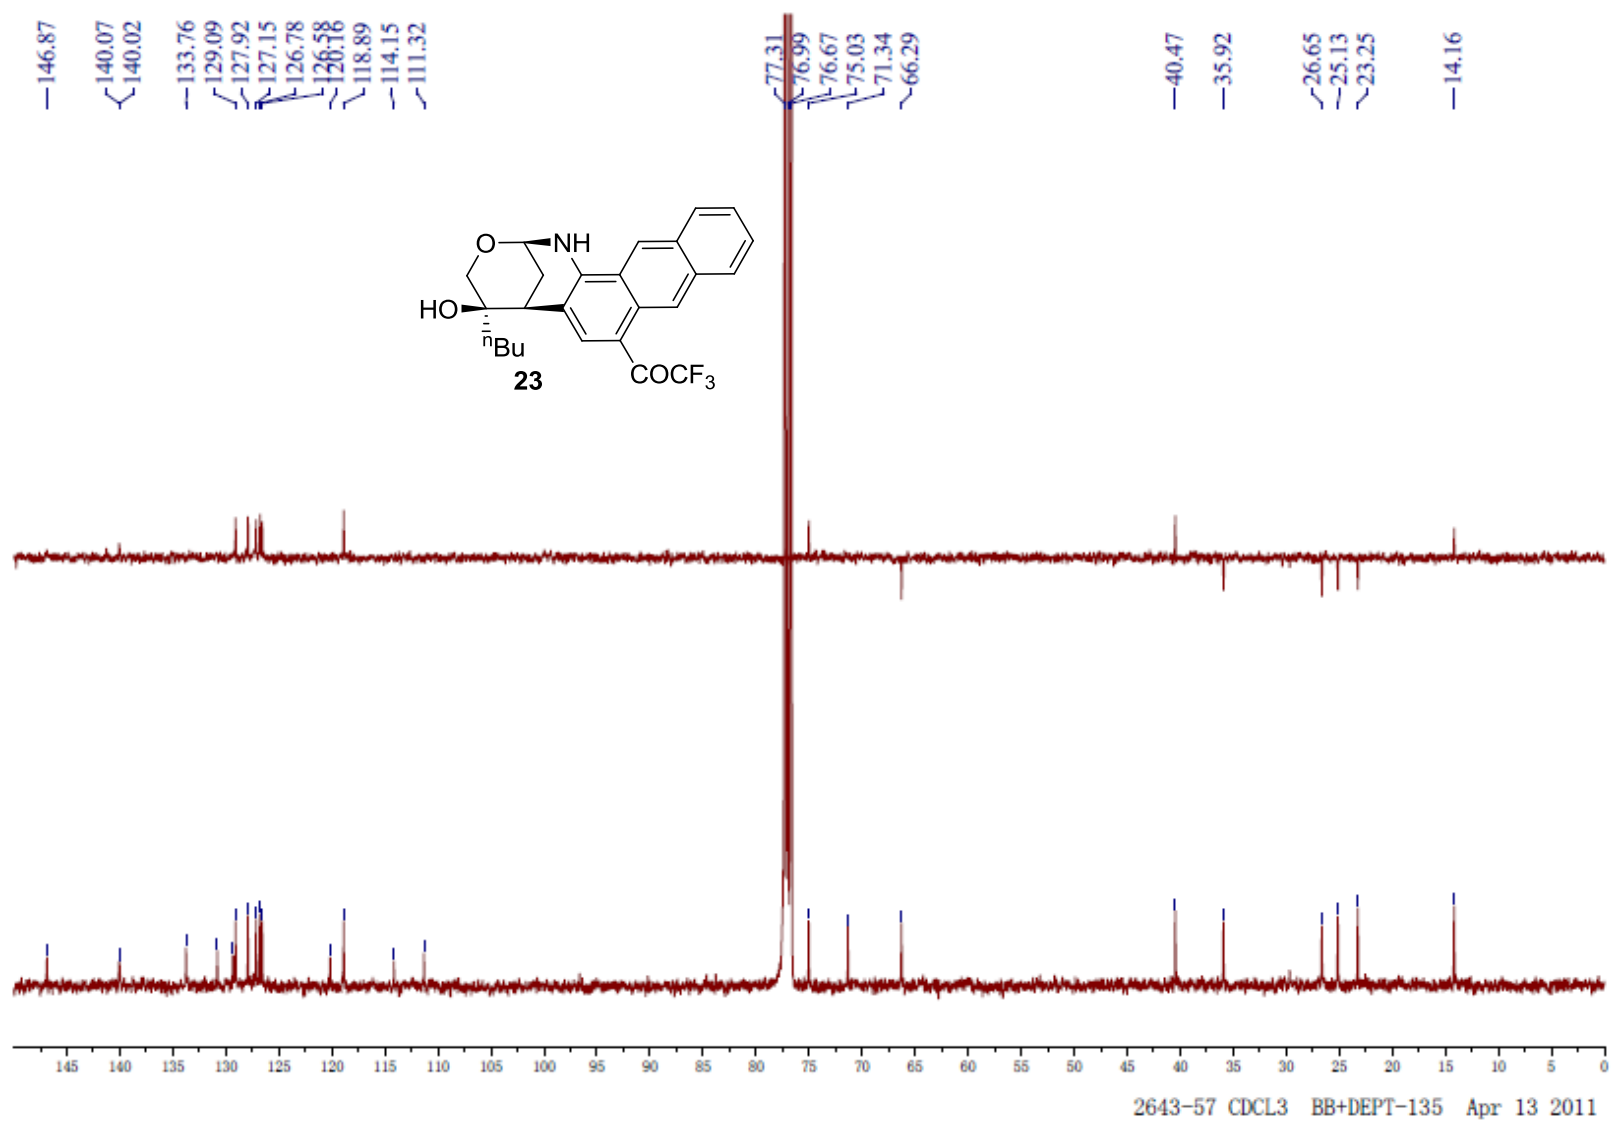

# CD

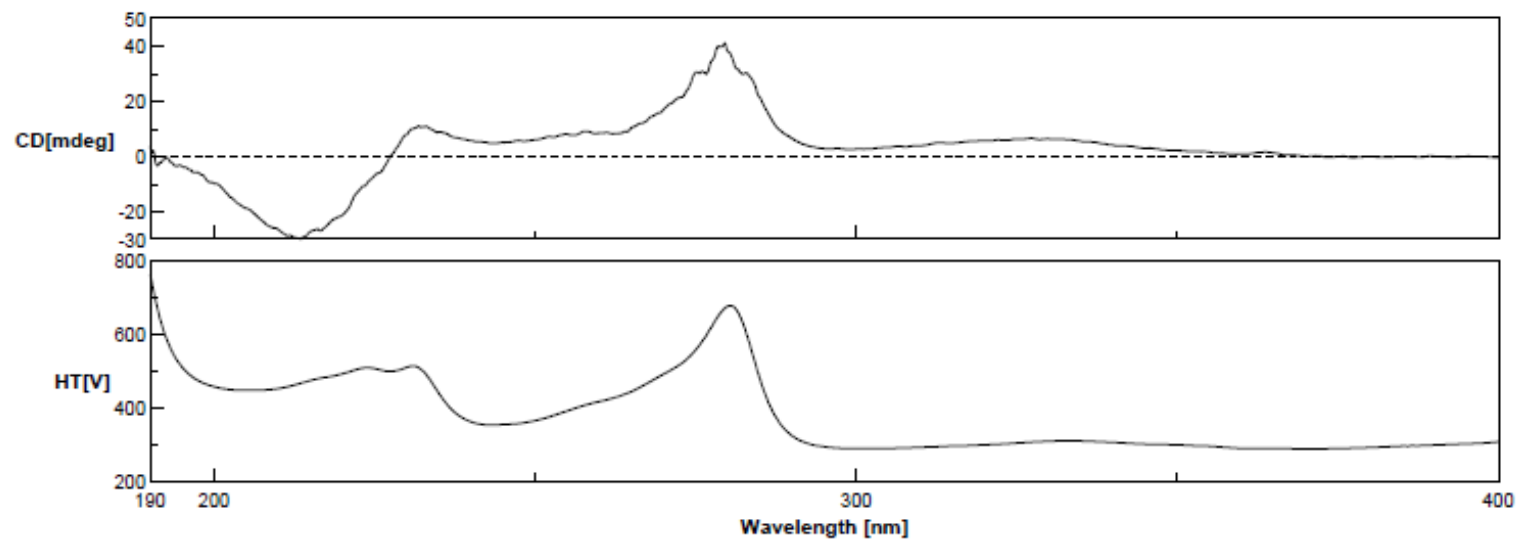

Date 2011/4/15 13:47  
Model J-810  
Serial No. B027760750  
Band width 1 nm  
Response 1 sec  
Sensitivity Standard  
Measurement range 400 - 190 nm  
Data pitch 0.1 nm  
Scanning speed 100 nm/min  
Accumulation 3  
Cell Length 0.05 cm  
Concentration 0.064 (w/v)%  
Solvent MeOH-s  
Temperature Room Temperature  
Sample name 2643-53-1a

File name 2643-53-1a.jws

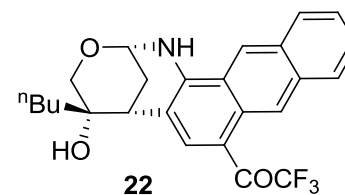

# CD

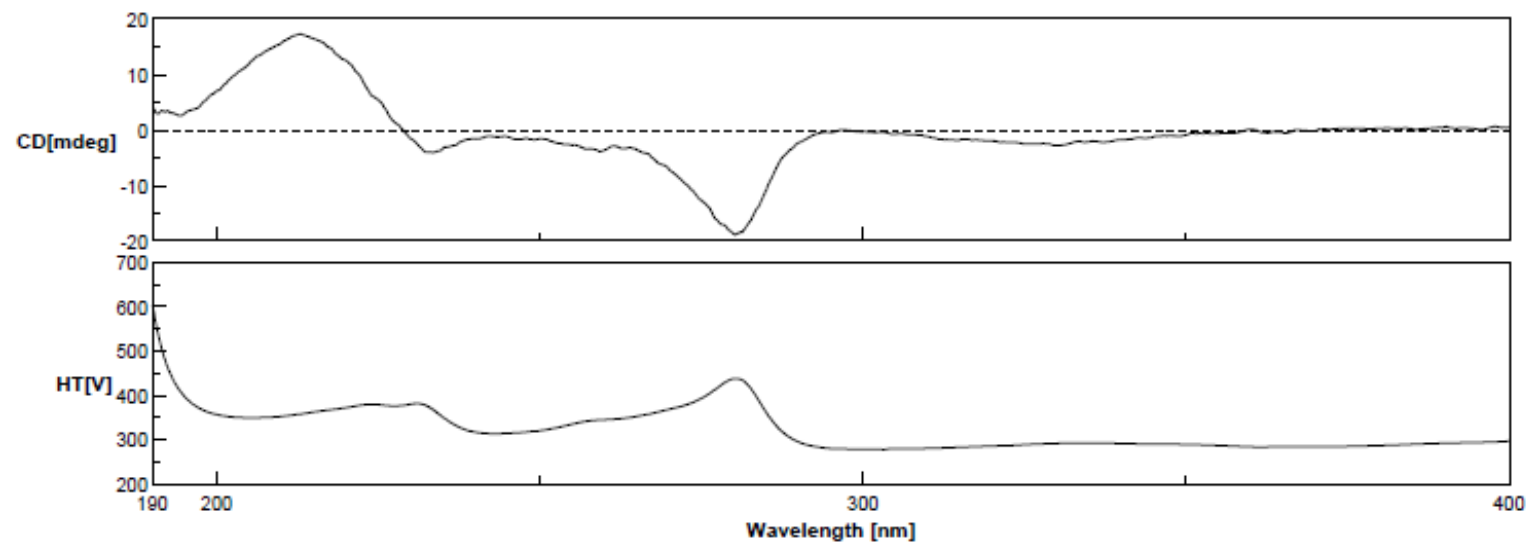

Date 2011/4/15 13:54  
Model J-810  
Serial No. B027760750  
Band width 1 nm  
Response 1 sec  
Sensitivity Standard  
Measurement range 400 - 190 nm  
Data pitch 0.1nm  
Scanning speed 100 nm/min  
Accumulation 3  
Cell Length 0.05 cm  
Concentration 0.045 (w/v)%  
Solvent MeOH-g  
Temperature Room Temperature  
Sample name 2643-57

File name 2643-57.jws

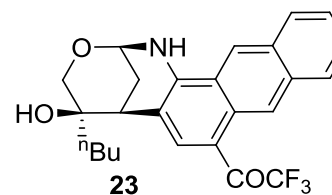

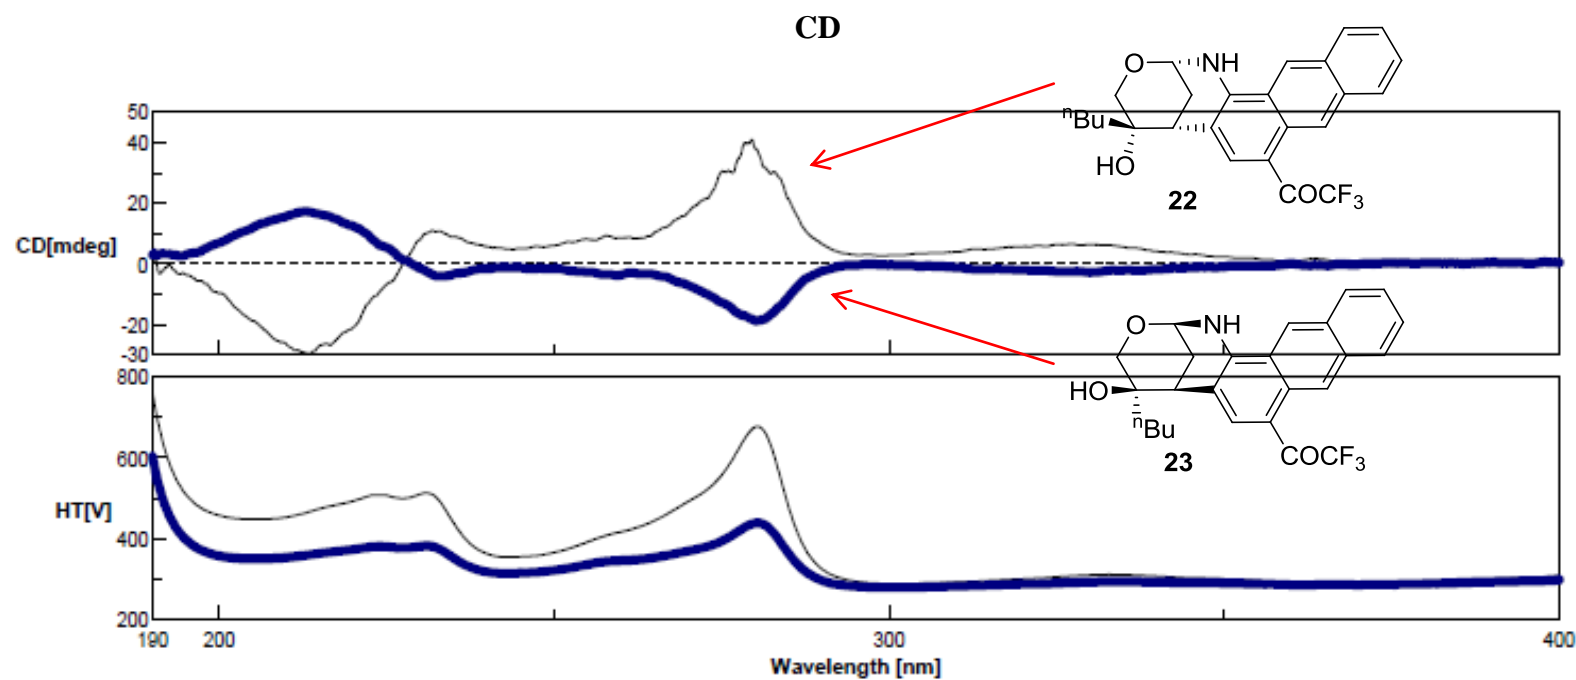

Date 2011/4/15 13:54  
File name 2643-57.jws  
Model J-810  
Serial No. B027760750  
Band width 1 nm  
Response 1 sec  
Sensitivity Standard  
Measurement range 400 - 190 nm  
Data pitch 0.1 nm  
Scanning speed 100 nm/min  
Accumulation 3  
Cell Length 0.05 cm  
Concentration 0.045 (w/v)%  
Solvent MeOH-g  
Temperature Room Temperature

— 2643-53-1a.jws  
— 2643-57.jws
